# Supplementary material for: Histone lysine demethylase KDM4B regulates the alternative splicing of the androgen receptor in response to androgen deprivation
Source: PubMed Central journal article supplement — Nucleic Acids Res. 2019 Oct 24;47(22):11623–36. doi: 10.1093/nar/gkz1004 (PMC7145715; doi:10.1093/nar/gkz1004), 2019-10-24
Supplement: gkz1004_supplemental_file.pdf [file gkz1004_supplemental_file.pdf]

Supplemental Figures.

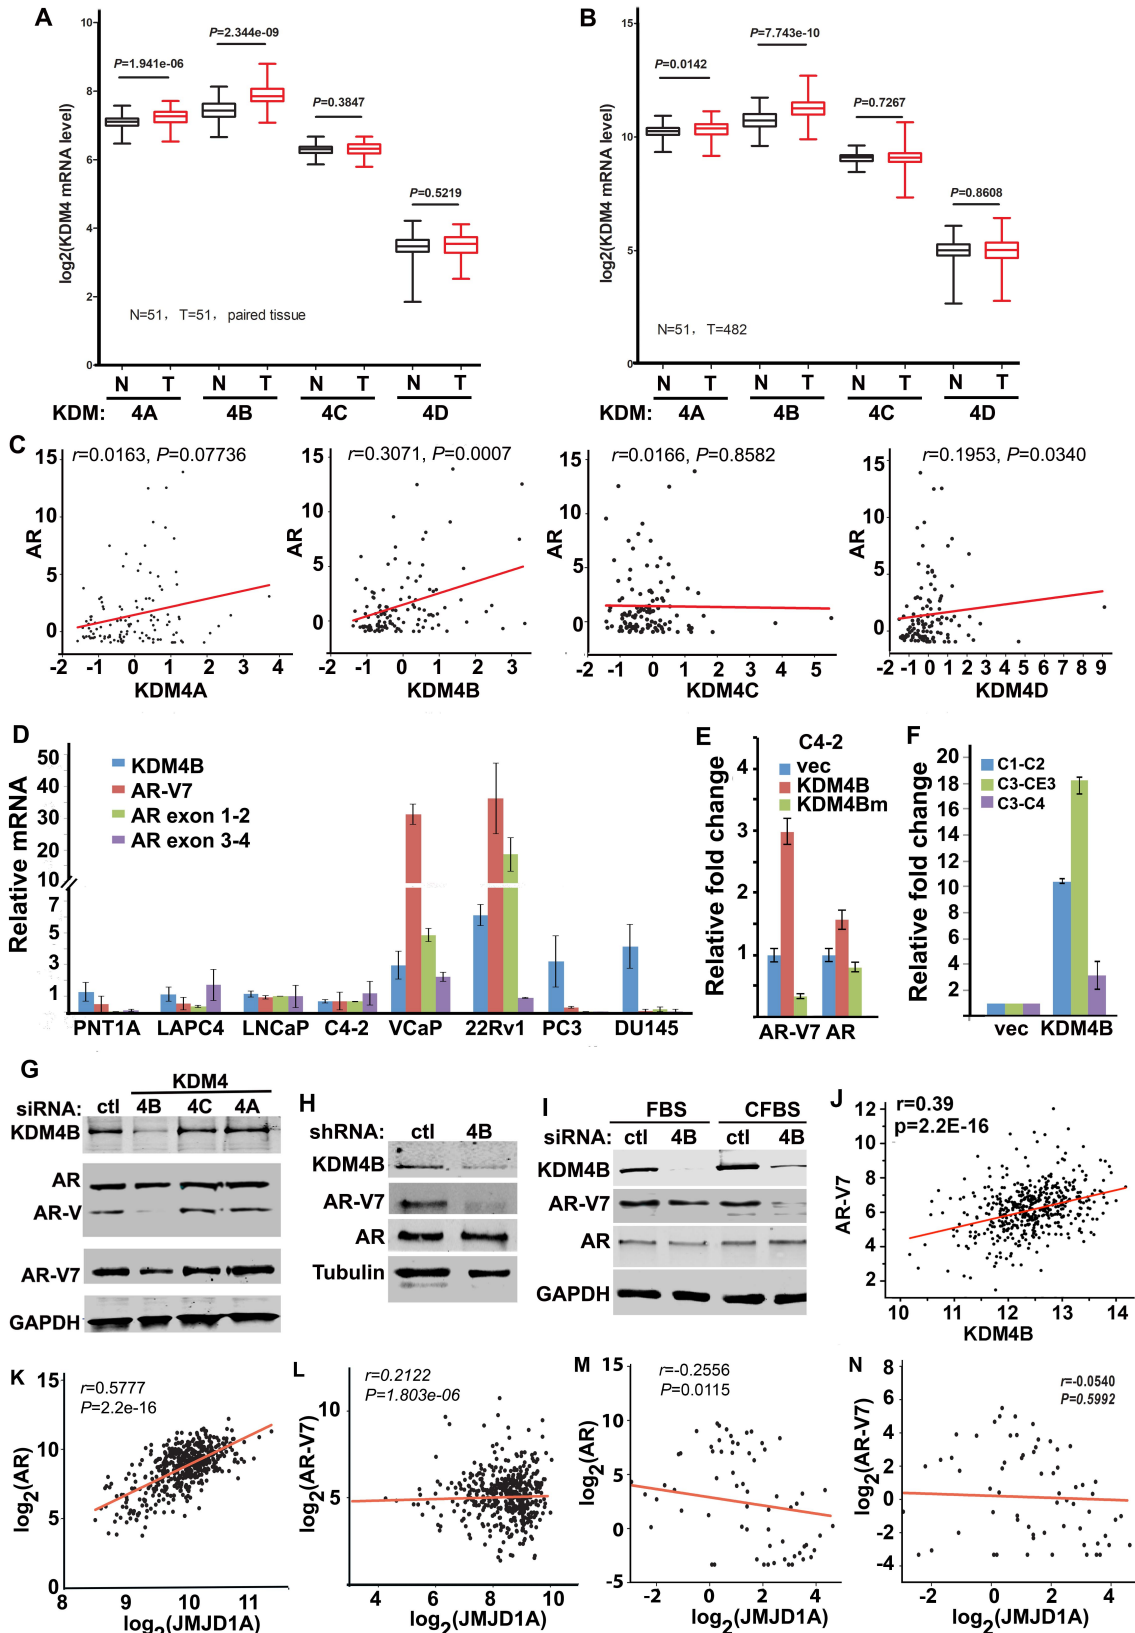

Figure S1. KDM4B promotes AR-V7 expression. (A-B) T-tests of mRNAs of KDM4 isoforms (4A-D)

between prostate tumor (T) and nearby normal tissues (N) (A) and between normal tissues and all

tumors (B). Data were taken from TCGA. (C) Spearman's correlation between z-scores of AR and KDM4 isoforms. Data is from the SU2C dataset in cBioPortal. (D) Relative mRNA of KDM4B, AR-V7, and AR in various PCa cell lines. mRNAs were normalized against internal GAPDH and expressed relative to the expression of KDM4B in PNT1A cells (n=3, mean  $\pm$  SD). (E) Relative fold change of AR-V7 and AR in C4-2 cells transfected with vector, KDM4B or KDM4Bm. mRNAs were normalized against internal GAPDH and expressed relative to vector-transfected cells (n=3, mean  $\pm$  SD). (F) Relative mRNA of AR-V7 and AR in LNCaP cells transfected with vec or KDM4B (n=3, mean  $\pm$  SD). AR-V7 was measured using the primers in exon 3 and CE3. AR mRNA was measured using primers in exons 3 and 4, and primers from exons 1 and 2. The overall AR transcription as measured by primers from C1 and C2, which give rise to AR-V7 and AR via splicing, is significantly increased in LNCaP cells transfected with KDM4B as well. Values are normalized to internal Calnexin and expressed relative to that in vector transfected cell (n=3, mean  $\pm$  SD). (G) Western blot of proteins indicated from 22Rv1 cells transfected with ctl or siRNA against KDM4A, 4B, and 4C. Anti-AR NTD antibody (N20, rabbit polyclonal, Santa Cruz, no longer in production) was used for detecting AR and AR-Vs. (H) Western blot of AR-V7 and AR in 22Rv1 cells transduced with control (ctl) or KDM4B (4B) shRNA. (I) West blot of protein indicated from 22Rv1 cells transfected with ctl or KDM4B siRNA cultured under FBS or CFBS condition. (J) Spearman's correlation between KDM4B and AR from TCGA dataset. (K, L) Spearman's correlation between JMJD1A and AR (K), JMJD1A and AR-V7 (L) from TCGA dataset. (M, N) Spearman's correlation between JMJD1A and AR (M), between JMJD1A and AR-V7 (N) from the SU2C dataset.

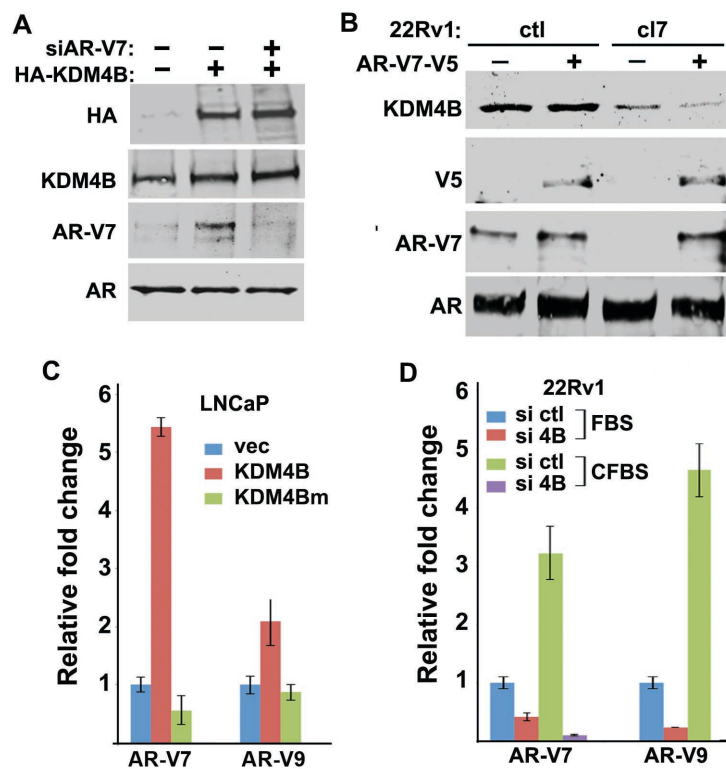

**Figure S2.** (A) Western blot of indicated proteins in LNCaP cells transfected with KDM4B, control or AR-V7 specific siRNA. (B) Western blot of indicated proteins in 22Rv1-ctl and KDM4B KD 22Rv1-cl7 cells transduced without or with C-terminal V5 tagged-AR-V7. (C, D) Relative mRNA of AR-V7 and AR-V9 in LNCaP cells transfected with vector, KDM4B or KDM4Bm (C) and in 22Rv1 cells transfected with control or KDM4B siRNA (D). Values are normalized against internal GAPDH and expressed relative to vector-transfected (C) or control siRNA transfected (D) cells (n=4, mean  $\pm$  SEM).

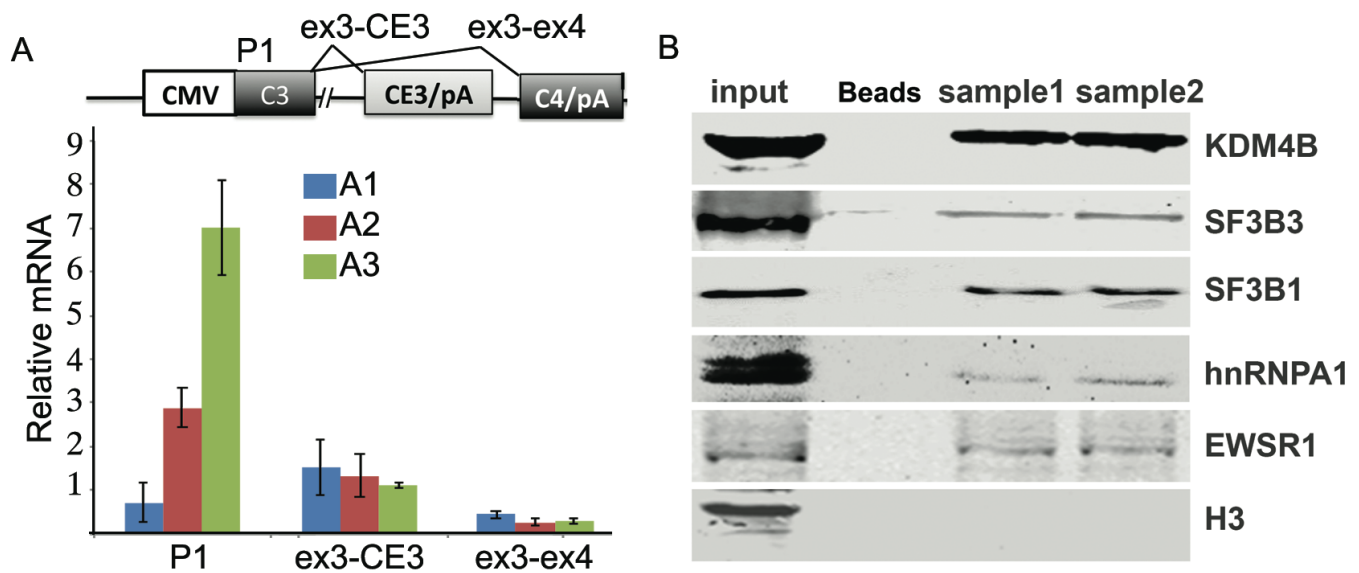

**Figure S3.** (A) Relative transcripts of minigenes A1, A2, and A3 in KEK294T cells. Equal amounts of minigenes were transfected into HEK293T cells with  $\beta$ -galactosidase. Cellular RNAs were extracted 48 hrs post-transfection and converted to cDNA. Relative mRNAs were measured with primers indicated and normalized to co-transfected  $\beta$ -galactosidase. (B) Western blot of proteins in biotin pulled-down complexes from 22Rv1 cells. A Biotin-labeled RNA probe containing 4BRBS (sample 1 and sample 2) was mixed with 22Rv1 cell lysates. After 4 h incubation, RNA-bound proteins were pulled down with streptavidin-beads, washed, separated on SDS-PAGE, and probed with antibodies against proteins indicated.

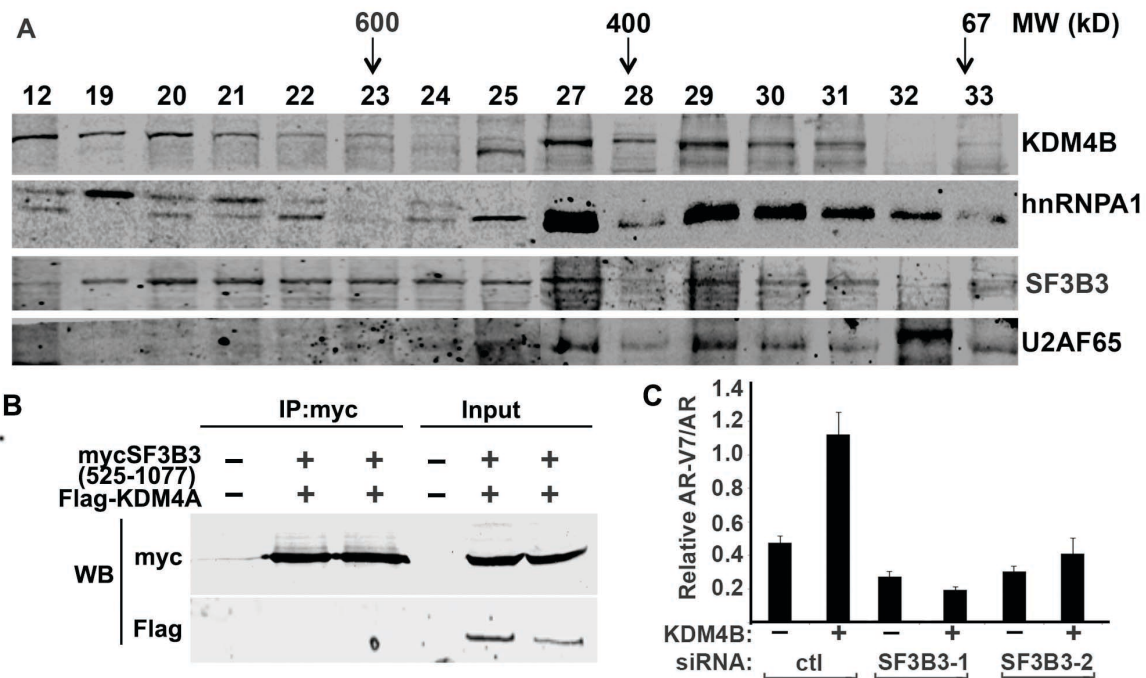

**Figure S4. KDM4B is associated with the spliceosome.** (A) 22Rv1 cell lysates were subjected to FPLC with a Sepharose 6 gel filtration column. Fractions were collected and subjected to Western blot analysis. The arrows mark molecular weights. Fraction numbers are marked. KDM4B co-elutes with the core components of the spliceosome SF3B3 and U2AF65. (B) 293T cells were transfected with mycSF3B3 (525-1077) and Flag-KDM4A. (C) Cell lysates were immunoprecipitated with anti-myc antibody and western blotted with anti-Flag. 293T cells were transfected with control (ctl) and SF3B3 specific siRNAs. 72 h post-transfection, cells were transfected AR-V7 minigene A1 along with or without KDM4B as indicated. Cells were harvested 48 h later and RNAs were extracted for qRT-PCR for quantification of relative AR-V7 and AR ( $n=3 \pm SD$ ).

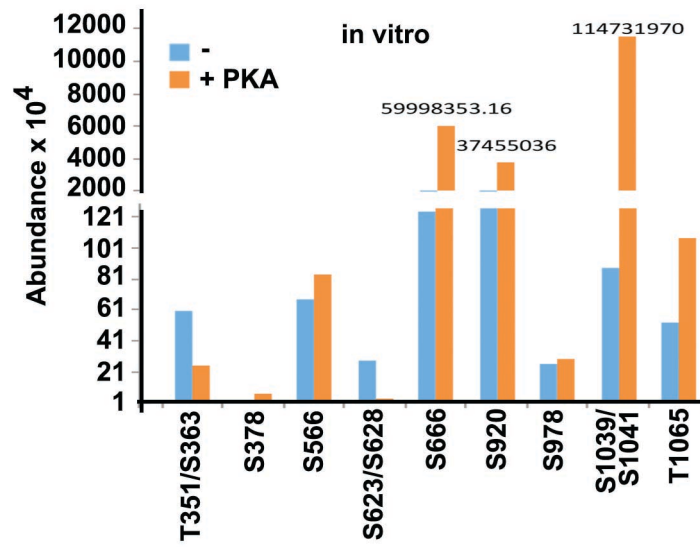

**Figure S5. KDM4B is phosphorylated by PKA.** Recombinant KDM4B proteins phosphorylated without or with PKA were subjected to phosphorylation analysis by MASS spectrometry.

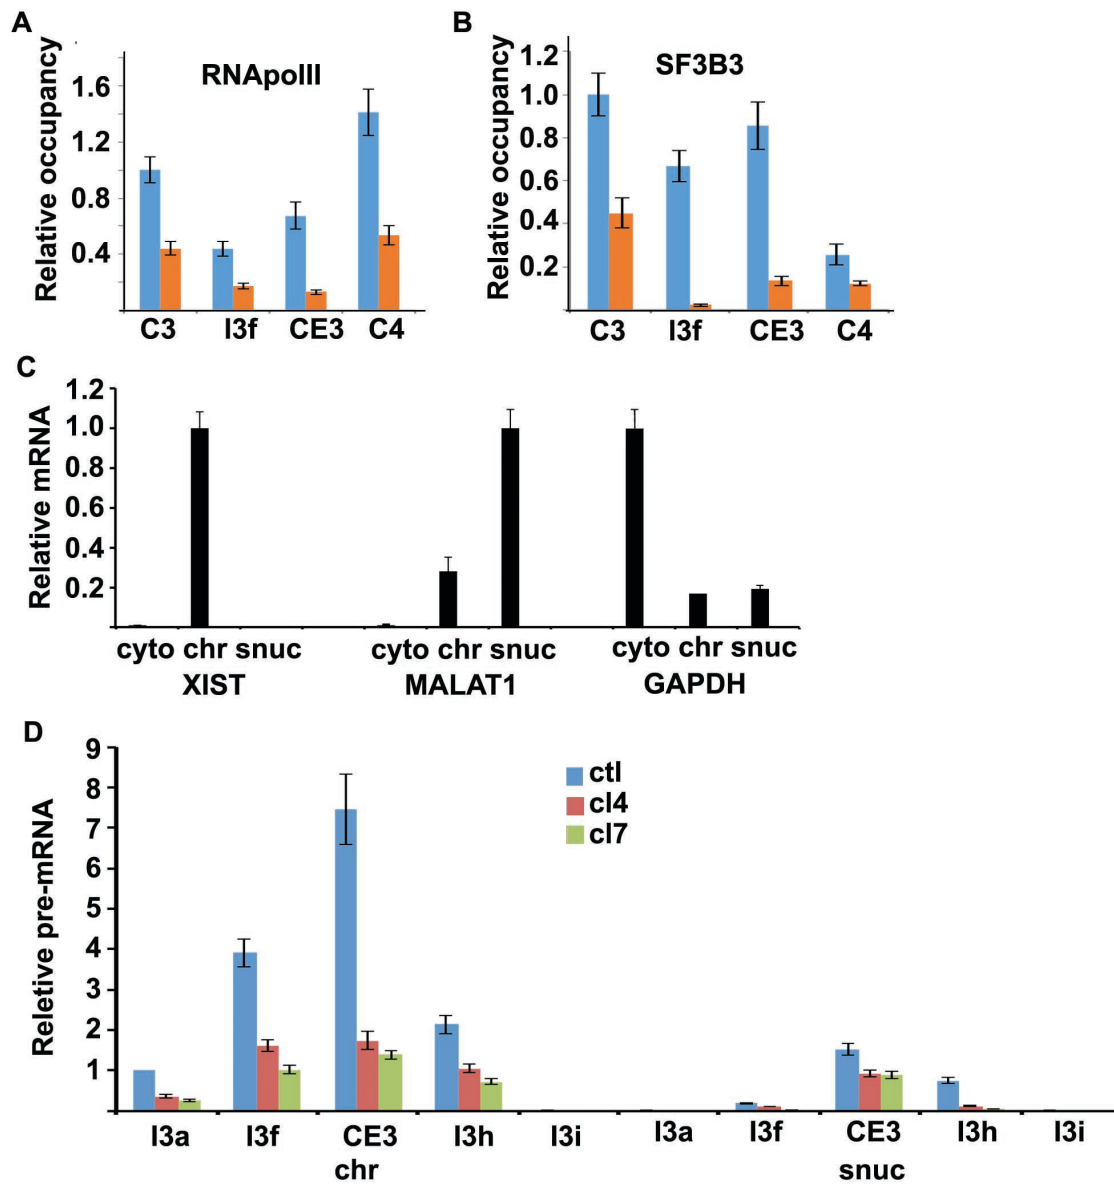

**Figure S6. KDM4B binds chromatin near the CE3 region.** (A-B) Relative chromatin occupancy of (A) RNApolIII and (B) SF3B3 in 22Rv1-ctl and 22Rv1-cl4 cells. KDM4B KD downregulated chromatin binding of RNApolIII and SF3B3 in the CE3 region. (C) Relative expression of XIST, MALAT1, and GAPDH in chromatin, soluble nuclear, and cytosol fraction of 22Rv1 cells assayed by qRT-PCR. (D) Relative pre-mRNA near CE3 of AR in chromatin and soluble nuclear fractions of control and KDM4B KD 22Rv1 cells. The PCR primer pairs used are pictured below the graph. n=3, mean  $\pm$  SD.

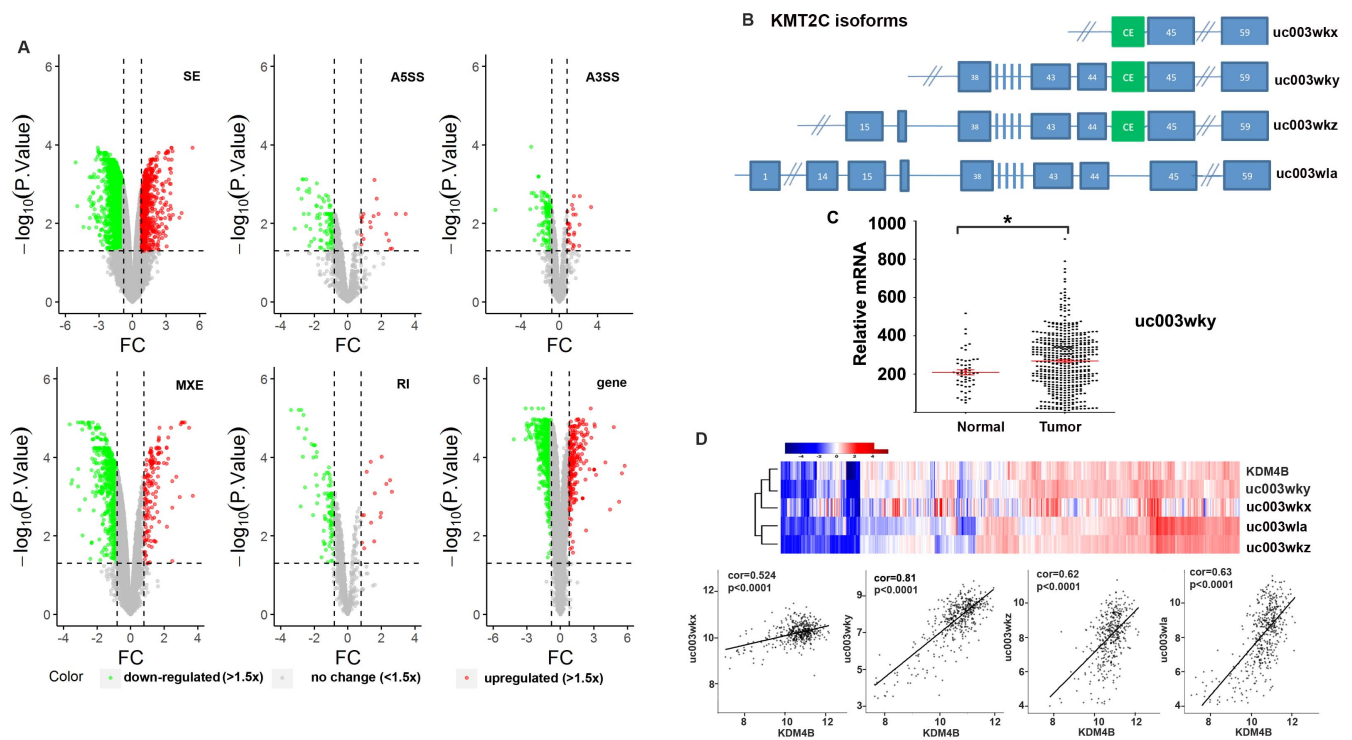

**Figure S7. KDM4B targets global alternative splicing.** (A) Volcano plot of differential alternative splicing events and genes between LNCaP-ctl and LNCaP-4B cells. (B) Schematics of 4 KDMT2C isoforms identified from UCSD-genome-wide browser. Isoforms uc003wqx, uc003wky, and uc003wkz contain an alternatively spliced cryptic exon ce whereas isoform uc003wla does not. (C) Relative mRNA levels of uc003wky in normal (n=50) vs tumor tissues (n=500) in TCGA database. \*,  $p < 0.05$ . (D) Spearman's correlation analysis of levels of KDM4B vs KMT2C isoforms. The KDM4B level had strong positive correlation with KMT2C isoforms.



**Table S1.** Proteins identified in immunoprecipitates of LNCaP-4B cells. Stable LNCaP cells with overexpressed Flag-KDM4B/JMJD2B (LNCaP-4B) were lysed. Cell lysates were immunoprecipitated with anti-Flag antibody or control IgG, washed, eluted with 3xFlag peptide, and subjected to SDS-PAGE and mass spectrometry.

**Table S2.** Proteins identified in immunoprecipitates of LNCaP-4B cells. LNCaP-4B cell lysates were immunoprecipitated with anti-Flag antibody, treated with RNase, washed, and eluted with 3xFlag peptide, and subjected to SDS-PAGE and mass spectrometry.

**Table S3.** qRT-PCR primers used in this paper.

Table S1  
Flag vs IgG

| Protein (UniP) | Gene Symbol | Description | Length (AA) | mw (Da)   | Indistinguisha | PSMs | Peptide Seqs | % Coverage | Modifications | SPECTRAL COUNTS |         | SPECTRAL INDEX (MIC Sin) |          | RATIO           |
|----------------|-------------|-------------|-------------|-----------|----------------|------|--------------|------------|---------------|-----------------|---------|--------------------------|----------|-----------------|
|                |             |             |             |           |                |      |              |            |               | Flag-JMJD2B     | control | Flag-JMJD2B              | control  | Flag-2B/control |
| B0QY89         | EIF3L       | B0QY89_HUM  | 607         | 61118.80  | Q9Y262;Q9Y     | 19   | 11           | 24.20      | Gln->pyro-Gl  | 11.96           | 5.98    | 2.34E-06                 | 6.74E-07 | 2.00            |
| P0CG05         | IGLC2       | LAC2_HUMA   | 106         | 11248.50  | P0CG06;        | 3    | 3            | 41.50      |               | 2.00            | 1.00    | 1.06E-06                 | 4.54E-07 | 2.00            |
| H7C3T4         | PRDX4       | H7C3T4_HUM  | 161         | 30592.80  | Q13162;        | 11   | 6            | 35.40      | Gln->pyro-Gl  | 5.00            | 2.50    | 3.65E-06                 | 5.98E-06 | 2.00            |
| E7EPB3         | RPL14       | E7EPB3_HUM  | 124         | 23471.10  | P50914;        | 3    | 2            | 19.40      |               | 2.00            | 1.00    | 2.40E-06                 | 8.03E-07 | 2.00            |
| F8VUA6         | RPL18       | F8VUA6_HUM  | 130         | 21675.10  | F8VWC5;G3V     | 6    | 2            | 20.00      |               | 4.00            | 2.00    | 2.66E-06                 | 1.42E-06 | 2.00            |
| P62857         | RPS28       | RS28_HUMA   | 69          | 7854.21   |                | 3    | 2            | 30.40      |               | 2.00            | 1.00    | 2.87E-06                 | 1.63E-06 | 2.00            |
| P49411         | TUFM        | EFTU_HUMA   | 452         | 49636.20  |                | 6    | 4            | 12.20      | Gln->pyro-Gl  | 4.00            | 2.00    | 1.24E-06                 | 2.36E-07 | 2.00            |
| P16989         | YBX3        | YBOX3_HUM   | 372         | 38602.80  | P16989-2;P1    | 3    | 2            | 8.30       |               | 1.98            | 0.99    | 6.14E-07                 | 9.25E-08 | 2.00            |
| P23528         | CFL1        | COF1_HUMA   | 166         | 18526.70  |                | 6    | 3            | 22.30      | Acetyl (Prote | 3.95            | 1.97    | 4.17E-06                 | 8.79E-07 | 2.01            |
| P68363         | TUBA1B      | TBA1B_HUM   | 451         | 50245.70  |                | 16   | 16           | 45.70      | Carbamidom    | 9.66            | 4.80    | 1.19E-05                 | 3.42E-06 | 2.01            |
| P55884         | EIF3B       | EIF3B_HUMA  | 814         | 99219.20  | P55884-2;      | 14   | 8            | 11.90      | Acetyl (Prote | 8.99            | 4.00    | 1.22E-06                 | 2.54E-07 | 2.25            |
| E7ESA8         | PRPF31      | E7ESA8_HUM  | 450         | 40861.70  | Q8WWY3;Q8      | 13   | 8            | 29.70      | Carbamidom    | 8.91            | 3.96    | 5.18E-06                 | 7.16E-07 | 2.25            |
| P62277         | RPS13       | RS13_HUMA   | 151         | 17247.70  |                | 13   | 6            | 30.50      |               | 8.97            | 3.98    | 8.73E-06                 | 2.00E-06 | 2.25            |
| P68104         | EEF1A1      | EF1A1_HUM   | 462         | 50279.20  | Q5VTE0;        | 76   | 17           | 33.80      | Gln->pyro-Gl  | 53.87           | 21.96   | 6.97E-05                 | 9.24E-06 | 2.45            |
| P07437         | TUBB        | TBB5_HUMA   | 444         | 47862.10  | Q5JP53;        | 22   | 22           | 61.30      | Carbamidom    | 15.81           | 5.93    | 1.77E-05                 | 4.49E-06 | 2.67            |
| P04080         | CSTB        | CYTB_HUMA   | 98          | 11150.60  |                | 11   | 4            | 55.10      |               | 8.00            | 3.00    | 1.23E-05                 | 2.27E-06 | 2.67            |
| Q15365         | PCBP1       | PCBP1_HUM   | 356         | 37564.00  |                | 12   | 7            | 28.10      | Carbamidom    | 8.00            | 3.00    | 2.54E-06                 | 5.15E-07 | 2.67            |
| P68371         | TUBB4B      | TBB4B_HUM   | 445         | 49925.10  |                | 15   | 21           | 54.80      | Carbamidom    | 10.85           | 3.96    | 8.59E-06                 | 1.10E-06 | 2.74            |
| Q14152         | EIF3A       | EIF3A_HUMA  | 1382        | 166883.00 |                | 27   | 16           | 15.40      | Oxidation (M  | 20.00           | 7.00    | 1.53E-06                 | 4.61E-07 | 2.86            |
| Q13347         | EIF3I       | EIF3I_HUMA  | 325         | 36568.70  |                | 4    | 3            | 18.20      |               | 3.00            | 1.00    | 1.64E-06                 | 2.77E-07 | 3.00            |
| P62805         | HIST1H4H; H | H4_HUMAN    | 103         | 11378.40  |                | 4    | 2            | 17.50      |               | 3.00            | 1.00    | 2.49E-06                 | 4.55E-07 | 3.00            |
| P55795         | HNRNPH2     | HNRH2_HUM   | 449         | 49358.40  |                | 8    | 10           | 29.20      | Acetyl (Prote | 6.00            | 2.00    | 1.58E-06                 | 2.89E-07 | 3.00            |
| E9PH29         | PRDX3       | E9PH29_HUM  | 238         | 27747.20  | P30048;        | 4    | 3            | 15.50      |               | 3.00            | 1.00    | 6.44E-06                 | 2.90E-07 | 3.00            |
| P36578         | RPL4        | RL4_HUMAN   | 427         | 47793.50  |                | 4    | 4            | 10.80      |               | 3.00            | 1.00    | 5.32E-07                 | 7.79E-08 | 3.00            |
| P05141         | SLC25A5     | ADT2_HUMA   | 298         | 32903.20  |                | 5    | 4            | 13.40      | Acetyl (Prote | 3.00            | 1.00    | 2.31E-06                 | 2.88E-07 | 3.00            |
| ABMWD9         | SNRPGP15    | RUXGL_HUM   | 76          | 7114.68   | F5H013;P62     | 2    | 2            | 20.30      |               | 3.00            | 1.00    | 1.18E-05                 | 2.67E-07 | 3.00            |
| Q13247         | SRSF6       | SRSF6_HUM   | 344         | 38485.70  | Q13247-3;      | 4    | 2            | 5.40       |               | 3.00            | 1.00    | 1.50E-06                 | 2.45E-07 | 3.00            |
| O60506         | SYNCRIP     | HNRPQ_HUM   | 623         | 58843.40  | O60506-2;O6    | 4    | 3            | 6.30       |               | 2.97            | 0.99    | 5.12E-07                 | 5.65E-08 | 3.00            |
| P00390         | GSR         | GSHR_HUMA   | 522         | 53137.50  | P00390-2;P0    | 4    | 3            | 10.60      |               | 2.99            | 0.99    | 3.54E-07                 | 1.28E-08 | 3.02            |
| P38646         | HSPA9       | GRP75_HUM   | 679         | 73832.90  |                | 78   | 33           | 55.40      | Carbamidom    | 59.00           | 19.00   | 3.64E-05                 | 4.22E-06 | 3.11            |
| P98175         | RBM10       | RBM10_HUM   | 930         | 103640.00 | P98175-2;      | 18   | 11           | 15.30      |               | 13.00           | 4.00    | 1.54E-06                 | 2.52E-07 | 3.25            |
| P80238         | HSP90AB1    | HS90B_HUM   | 724         | 83428.20  |                | 15   | 8            | 11.20      |               | 10.90           | 2.97    | 1.29E-06                 | 1.83E-07 | 3.67            |
| E9PKG1         | PRMT1       | E9PKG1_HUM  | 325         | 40612.10  | H7C211;Q998    | 24   | 12           | 37.20      | Carbamidom    | 18.88           | 4.96    | 6.79E-06                 | 8.10E-07 | 3.81            |
| B3KSH1         | EIF3F       | B3KSH1_HUM  | 372         | 37630.20  | O00303;        | 10   | 5            | 17.40      |               | 7.92            | 1.98    | 2.86E-06                 | 4.69E-07 | 4.00            |
| P08107         | HSPA1B; HSP | HSP71_HUM   | 641         | 70189.10  |                | 16   | 13           | 24.20      |               | 12.91           | 2.98    | 2.88E-06                 | 2.29E-07 | 4.33            |
| P25705         | ATP5A1      | ATPA_HUMA   | 553         | 54603.80  | P25705-2;      | 11   | 7            | 16.50      |               | 8.90            | 1.98    | 1.73E-06                 | 1.34E-07 | 4.49            |
| Q92804         | TAF15       | RBP56_HUM   | 592         | 61683.10  | Q92804-2;      | 11   | 7            | 18.20      | Carbamidom    | 8.91            | 1.98    | 2.23E-06                 | 4.93E-08 | 4.50            |
| P11142         | HSPA8       | HSP7C_HUM   | 646         | 71034.30  |                | 47   | 27           | 44.70      | Carbamidom    | 37.95           | 7.80    | 1.15E-05                 | 8.82E-07 | 4.87            |
| P60709         | ACTB        | ACTB_HUMA   | 375         | 41817.80  |                | 72   | 18           | 61.60      | Acetyl (Prote | 57.86           | 11.62   | 1.85E-04                 | 4.29E-06 | 4.98            |
| B4DLW8         | DDX5        | B4DLW8_HUM  | 535         | 69284.80  | J3KTA4;P178    | 8    | 6            | 12.30      | Oxidation (M  | 5.00            | 1.00    | 1.02E-06                 | 1.90E-07 | 5.00            |
| P49327         | FASN        | FAS_HUMAN   | 2511        | 273993.00 |                | 32   | 22           | 10.50      | Acetyl (Prote | 27.00           | 5.00    | 1.45E-06                 | 6.71E-08 | 5.40            |
| P46821         | MAP1B       | MAP1B_HUM   | 2468        | 271206.00 |                | 47   | 33           | 20.90      | Acetyl (Prote | 39.92           | 6.99    | 2.27E-06                 | 1.45E-07 | 5.71            |
| B4E2Q4         | EIF3M       | B4E2Q4_HUM  | 242         | 42583.90  | Q7L2H7;        | 7    | 4            | 16.50      |               | 5.98            | 1.00    | 1.34E-06                 | 6.64E-08 | 5.98            |
| Q15393         | SF3B3       | SF3B3_HUM   | 1217        | 135852.00 |                | 7    | 6            | 5.90       |               | 5.99            | 1.00    | 4.38E-07                 | 4.01E-08 | 5.99            |
| Q92499         | DDX1        | DDX1_HUMA   | 740         | 82595.90  |                | 7    | 4            | 6.50       |               | 6.00            | 1.00    | 6.54E-07                 | 3.38E-08 | 6.00            |
| Q92734         | TFG         | TFG_HUMAN   | 400         | 43102.00  | Q92734-2;      | 71   | 16           | 49.00      | Acetyl (Prote | 60.64           | 9.92    | 6.47E-05                 | 4.68E-06 | 6.11            |
| P52907         | CAPZA1      | CAZA1_HUM   | 286         | 32974.40  |                | 8    | 5            | 29.00      | Acetyl (Prote | 7.00            | 1.00    | 3.15E-06                 | 1.42E-07 | 7.00            |
| P04792         | HSPB1       | HSPB1_HUM   | 205         | 22822.50  |                | 8    | 4            | 25.90      | Gln->pyro-Gl  | 7.00            | 1.00    | 5.98E-06                 | 1.68E-07 | 7.00            |
| P22626         | HNRNPA2B1   | ROA2_HUMA   | 353         | 37496.80  |                | 34   | 17           | 53.50      | Oxidation (M  | 30.00           | 4.00    | 2.74E-05                 | 1.17E-06 | 7.50            |
| H7BY58         | PCMT1       | H7BY58_HUM  | 286         | 24717.60  | J3KP72;P220    | 35   | 11           | 59.50      | Carbamidom    | 30.98           | 4.00    | 4.36E-05                 | 1.84E-06 | 7.75            |
| P11021         | HSPA5       | GRP78_HUM   | 654         | 72468.50  |                | 45   | 31           | 52.00      | Oxidation (M  | 39.00           | 5.00    | 8.06E-06                 | 6.41E-07 | 7.80            |
| E9PHS0         | LANCL1      | E9PHS0_HUM  | 196         | 45361.60  | O43813;        | 14   | 7            | 38.80      | Carbamidom    | 13.00           | 1.00    | 2.12E-05                 | 2.34E-07 | 13.00           |
| P35637         | FUS         | FUS_HUMAN   | 526         | 53466.80  | P35637-2;      | 29   | 10           | 19.40      | Ammonia-los   | 28.00           | 1.00    | 2.28E-05                 | 4.34E-08 | 28.00           |
| P24752         | ACAT1       | THIL_HUMAN  | 427         | 45296.70  |                | 3    | 3            | 8.70       |               | 3.00            |         | 1.05E-06                 |          | jmjd2B only     |
| Q562R1         | ACTBL2      | ACTBL_HUM   | 376         | 42084.00  |                | 1    | 6            | 17.60      | Oxidation (M  | 1.00            |         | 1.20E-05                 |          | jmjd2B only     |
| H7C550         | ACTL6A      | H7C550_HUM  | 161         | 43316.40  | O96019;O96     | 2    | 2            | 17.40      |               | 2.00            |         | 7.42E-07                 |          | jmjd2B only     |
| Q5TA58         | AGO1        | Q5TA58_HUM  | 782         | 97404.30  | Q9UL18;        | 1    | 2            | 3.20       |               | 1.00            |         | 8.91E-08                 |          | jmjd2B only     |
| Q9UKV8         | AGO2        | AGO2_HUMA   | 859         | 93794.30  | Q9UKV8-2;      | 4    | 4            | 5.80       |               | 4.00            |         | 4.99E-07                 |          | jmjd2B only     |
| Q9H9G7         | AGO3        | AGO3_HUMA   | 860         | 71345.50  | Q9H9G7-2;      | 1    | 2            | 4.00       |               | 0.99            |         | 8.58E-08                 |          | jmjd2B only     |
| P54886         | ALDH18A1    | P5CS_HUMA   | 795         | 87268.60  | P54886-2;      | 3    | 3            | 4.90       |               | 3.00            |         | 2.66E-07                 |          | jmjd2B only     |
| B3VOL1         | ARL6IP4     | B3VOL1_HUM  | 226         | 36279.20  | F5GYV5;F8W     | 3    | 3            | 19.00      |               | 2.97            |         | 1.31E-06                 |          | jmjd2B only     |
| H0YH81         | ATP5B       | H0YH81_HUM  | 362         | 56668.70  | P06576;        | 2    | 2            | 9.10       |               | 1.98            |         | 4.51E-07                 |          | jmjd2B only     |
| Q9Y224         | C14orf166   | CN166_HUM   | 244         | 28122.80  |                | 3    | 3            | 16.40      |               | 3.00            |         | 1.72E-06                 |          | jmjd2B only     |
| B1AK87         | CAPZB       | B1AK87_HUM  | 260         | 30681.40  | B1AK88;P47     | 4    | 3            | 14.60      |               | 3.98            |         | 1.79E-06                 |          | jmjd2B only     |
| Q00610         | CLTC        | CLH1_HUMA   | 1675        | 188257.00 | Q00610-2;      | 16   | 13           | 10.40      |               | 15.98           |         | 1.01E-06                 |          | jmjd2B only     |
| P62633         | CNBP        | CNBP_HUMA   | 177         | 19713.70  | P62633-2;P6    | 3    | 2            | 13.50      | Carbamidom    | 2.97            |         | 4.74E-06                 |          | jmjd2B only     |
| C9JH19         | CTSD        | C9JH19_HUM  | 299         | 44631.70  | CONT_CATD      | 3    | 3            | 19.10      | Gln->pyro-Gl  | 2.00            |         | 7.84E-07                 |          | jmjd2B only     |
| O00571         | DDX3X       | DDX3X_HUM   | 662         | 71491.00  | O00571-2;      | 7    | 7            | 14.10      | Oxidation (M  | 6.98            |         | 1.35E-06                 |          | jmjd2B only     |
| Q43143         | DDX15       | DDX15_HUM   | 795         | 91109.30  |                | 2    | 2            | 3.10       |               | 2.00            |         | 1.49E-07                 |          | jmjd2B only     |
| Q8IXB1         | DNAJC10     | DIC10_HUM   | 793         | 91255.40  |                | 2    | 2            | 2.80       |               | 2.00            |         | 1.44E-07                 |          | jmjd2B only     |
| Q13011         | ECH1        | ECH1_HUMA   | 328         | 35883.40  |                | 3    | 3            | 12.50      |               | 2.99            |         | 6.78E-07                 |          | jmjd2B only     |
| E9PI39         | EEF1D       | E9PI39_HUM  | 204         | 28612.40  | E9PIZ1;E9PK    | 2    | 2            | 17.50      |               | 2.00            |         | 7.54E-07                 |          | jmjd2B only     |
| B4DTG2         | EEF1G       | B4DTG2_HUM  | 487         | 50213.20  | P26641;        | 3    | 2            | 5.30       |               | 3.00            |         | 5.25E-07                 |          | jmjd2B only     |
| B4DVY1         | EIF3D       | B4DVY1_HUM  | 499         | 64094.50  | O15371;        | 3    | 2            | 4.80       |               | 2.97            |         | 5.39E-07                 |          | jmjd2B only     |
| F8VP89         | EIF4B       | F8VP89_HUM  | 275         | 31274.00  |                | 1    | 4            | 12.70      |               | 1.00            |         | 8.42E-07                 |          | jmjd2B only     |
| B0QYK0         | EWSR1       | B0QYK0_HUM  | 618         | 62631.10  | Q01844;Q01     | 14   | 7            | 15.00      | Carbamidom    | 13.86           |         | 5.17E-06                 |          | jmjd2B only     |
| B4DT23         | FAM98A      | B4DT23_HUM  | 323         | 55382.30  | E9PH82;Q8N     | 2    | 2            | 8.70       |               | 2.00            |         | 2.66E-07                 |          | jmjd2B only     |
| K7ELX4         | FECH        | K7ELX4_HUM  | 326         | 48720.00  | P22830;P228    | 2    | 2            | 9.50       |               | 1.98            |         | 1.98E-07                 |          | jmjd2B only     |
| B4DT31         | FUBP1       | B4DT31_HUM  | 665         | 68742.10  | E9PEB5;Q96     | 2    | 3            | 4.70       |               | 2.00            |         | 1.90E-07                 |          | jmjd2B only     |
| E7EUT5         | GAPDH       | E7EUT5_HUM  | 260         | 31600.00  | P04406;P044    | 6    | 5            | 27.70      |               | 6.00            |         | 1.85E-06                 |          | jmjd2B only     |
| F8VTK5         | HNRNPA1     | F8VTK5_HUM  | 145         | 34294.30  | F8VZ49;F8W     | 4    | 3            | 29.00      |               | 3.96            |         | 3.30E-06                 |          | jmjd2B only     |
| P51991         | HNRNPA3     | ROA3_HUMA   | 378         | 37096.20  | P51991-2;      | 4    | 2            | 7.00       |               | 3.00            |         | 1.24E-06                 |          | jmjd2B only     |
| P52597         | HNRNPF      | HNRPF_HUM   | 415         | 45750.90  |                | 7    | 6            | 18.10      | Gln->pyro-Gl  | 7.00            |         | 3.14E-06                 |          | jmjd2B only     |

|        |           |            |      |           |             |    |    |       |               |       |          |             |
|--------|-----------|------------|------|-----------|-------------|----|----|-------|---------------|-------|----------|-------------|
| B4DHY1 | HNRNPH3   | B4DHY1_HU  | 238  | 15439.10  | P31942;P319 | 3  | 3  | 22.30 |               | 3.00  | 1.84E-06 | jmjd2B only |
| MOR019 | HNRNPM    | MOR019_HU  | 353  | 73770.50  | P52272;P522 | 1  | 2  | 5.90  |               | 1.00  | 1.37E-07 | jmjd2B only |
| Q99714 | HSD17B10  | HCD2_HUMA  | 261  | 26978.20  |             | 6  | 4  | 24.10 | Oxidation (M  | 5.97  | 3.42E-06 | jmjd2B only |
| P10809 | HSPD1     | CH60_HUMA  | 573  | 61178.50  |             | 17 | 13 | 30.00 | Carbamidom    | 16.93 | 4.00E-06 | jmjd2B only |
| P01857 | IGHG1     | IGHG1_HUM  | 330  | 36173.20  |             | 8  | 3  | 9.70  | Oxidation (M  | 6.00  | 2.29E-05 | jmjd2B only |
| P01834 | IGKC      | IGKC_HUMA  | 106  | 11619.70  |             | 1  | 2  | 30.20 |               | 1.00  | 5.24E-06 | jmjd2B only |
| F5GX28 | KDM4B     | F5GX28_HUM | 1130 | 126326.00 |             | 45 | 26 | 25.30 | Carbamidom    | 44.67 | 9.39E-06 | jmjd2B only |
| Q92945 | KHSRP     | FUBP2_HUM  | 711  | 73268.10  |             | 4  | 4  | 6.00  |               | 4.00  | 5.49E-07 | jmjd2B only |
| MOQZF9 | KLK3      | MOQZF9_HU  | 172  | 25153.70  | MOR1F0;MOR  | 4  | 3  | 20.30 |               | 2.98  | 2.47E-06 | jmjd2B only |
| P05787 | KRT8      | K2C8_HUMA  | 483  | 56717.50  | P05787-2;   | 2  | 10 | 13.50 |               | 2.00  | 2.46E-07 | jmjd2B only |
| Q08380 | LGALS3BP  | LG3BP_HUM  | 585  | 65451.40  |             | 4  | 4  | 7.50  |               | 3.99  | 5.01E-07 | jmjd2B only |
| B7Z8V7 | NADK2     | B7Z8V7_HU  | 301  | 31768.20  | Q4G0N4;Q4C  | 3  | 2  | 9.30  |               | 2.00  | 3.11E-07 | jmjd2B only |
| J3KPD9 | NME1-NME2 | J3KPD9_HUN | 197  | 32692.90  | P22392;P223 | 4  | 3  | 24.90 |               | 3.97  | 3.34E-06 | jmjd2B only |
| C9JYS8 | NONO      | C9JYS8_HUM | 248  | 43946.20  | Q15233;Q15  | 2  | 2  | 9.30  |               | 1.98  | 8.26E-07 | jmjd2B only |
| E9PAL9 | NTSDC2    | E9PAL9_HUN | 557  | 57311.00  | Q9H857;Q9H  | 2  | 2  | 4.30  |               | 2.00  | 3.15E-07 | jmjd2B only |
| H3BMW1 | NUBP2     | H3BMW1_HU  | 139  | 28878.90  | H3BNF0;H3B  | 1  | 2  | 45.70 |               | 1.00  | 6.91E-07 | jmjd2B only |
| Q53EL6 | PDCD4     | PDCD4_HUM  | 469  | 50670.60  | Q53EL6-2;   | 2  | 3  | 10.30 |               | 2.00  | 5.61E-07 | jmjd2B only |
| O75340 | PDCD6     | PDCD6_HUM  | 191  | 21908.80  |             | 11 | 5  | 21.50 | Oxidation (M  | 10.97 | 1.12E-05 | jmjd2B only |
| Q9UBV8 | PEF1      | PEF1_HUMA  | 284  | 30433.30  |             | 4  | 3  | 12.00 | Oxidation (M  | 4.00  | 3.90E-06 | jmjd2B only |
| O43175 | PHGDH     | SERA_HUMA  | 533  | 53195.50  | Q5SZU1;     | 4  | 4  | 9.60  |               | 4.00  | 6.48E-07 | jmjd2B only |
| Q9GZP4 | PITHD1    | PITH1_HUMA | 211  | 24159.80  | Q9GZP4-2;   | 3  | 2  | 9.50  |               | 3.00  | 1.43E-06 | jmjd2B only |
| B4E0V0 | PNPO      | B4E0V0_HUN | 166  | 30040.80  | B4E152;B4E1 | 2  | 2  | 10.20 |               | 1.99  | 1.39E-06 | jmjd2B only |
| P22694 | PRKACB    | KAPCB_HUM  | 351  | 41459.30  | P22694-2;P2 | 4  | 3  | 8.90  |               | 3.96  | 1.29E-06 | jmjd2B only |
| K7EM13 | PRKAR1A   | K7EM13_HU  | 153  | 43063.00  | K7EPB2;K7EP | 2  | 2  | 19.00 |               | 2.00  | 7.52E-07 | jmjd2B only |
| B5MDF5 | RAN       | B5MDF5_HU  | 233  | 24461.70  | HOYFC6;J3KC | 2  | 2  | 21.40 |               | 1.98  | 1.08E-06 | jmjd2B only |
| Q96PK6 | RBM14     | RBM14_HUN  | 669  | 69647.00  |             | 4  | 3  | 4.90  |               | 4.00  | 5.34E-07 | jmjd2B only |
| HOY6E7 | RBMX      | HOY6E7_HUM | 292  | 42224.30  | H3BR27;H3B  | 2  | 2  | 34.60 |               | 1.98  | 4.30E-07 | jmjd2B only |
| D6RAN4 | RPL9      | D6RAN4_HU  | 182  | 21903.80  | HOY9V9;P325 | 3  | 2  | 13.20 |               | 1.98  | 8.14E-07 | jmjd2B only |
| F8VWS0 | RPLP0     | F8VWS0_HU  | 281  | 27490.40  | F8VZS0;P053 | 2  | 2  | 11.00 |               | 1.98  | 7.35E-07 | jmjd2B only |
| Q9Y3I0 | RTCB      | RTCB_HUMA  | 505  | 55318.90  |             | 7  | 7  | 16.00 |               | 7.00  | 1.88E-06 | jmjd2B only |
| A6PVW9 | SELENBP1  | A6PVW9_HU  | 514  | 45428.30  | Q13228;Q13  | 3  | 3  | 8.10  |               | 2.97  | 3.93E-07 | jmjd2B only |
| E9PJ04 | SF3B2     | E9PJ04_HUM | 354  | 100417.00 | E9PJT3;HOYC | 3  | 3  | 15.40 |               | 2.97  | 6.07E-07 | jmjd2B only |
| P23246 | SFPQ      | SFPQ_HUMA  | 707  | 72415.90  | P23246-2;   | 2  | 2  | 4.20  |               | 2.00  | 2.25E-07 | jmjd2B only |
| B4DLV4 | SHMT2     | B4DLV4_HUM | 408  | 53565.50  | G3V2Y4;G3V  | 2  | 2  | 11.60 |               | 2.00  | 4.78E-07 | jmjd2B only |
| F8VXC8 | SMARCC2   | F8VXC8_HUM | 1245 | 127188.00 | Q8TAQ2;Q8T  | 4  | 4  | 3.50  | Gln->pyro-Gl  | 4.00  | 1.97E-07 | jmjd2B only |
| P08621 | SNRNP70   | RU17_HUMA  | 437  | 19814.00  | P08621-2;P0 | 8  | 5  | 34.30 |               | 8.00  | 2.14E-06 | jmjd2B only |
| MOR268 | SNRPA     | MOR268_HU  | 256  | 31331.20  | P09012;     | 10 | 7  | 36.70 | Acetyl (Prote | 9.00  | 4.62E-06 | jmjd2B only |
| J3KTL2 | SRSF1     | J3KTL2_HUM | 253  | 22500.00  | Q07955;Q07  | 5  | 4  | 21.40 | Carbamidom    | 4.95  | 1.69E-06 | jmjd2B only |
| HOYKU1 | TMOD3     | HOYKU1_HU  | 187  | 39660.40  | HOYNJ8;Q9N  | 4  | 4  | 28.90 | Gln->pyro-Gl  | 4.00  | 1.74E-06 | jmjd2B only |
| Q13263 | TRIM28    | TIF1B_HUMA | 835  | 79639.60  | Q13263-2;   | 3  | 2  | 6.10  | Acetyl (Prote | 2.98  | 3.05E-07 | jmjd2B only |
| A8MUB1 | TUBA4A    | A8MUB1_HU  | 433  | 50018.40  | P68366;     | 5  | 15 | 45.30 | Carbamidom    | 3.97  | 3.38E-06 | jmjd2B only |
| Q9NQH7 | XPNEP3    | XPP3_HUMA  | 507  | 54780.60  | Q9NQH7-4;   | 14 | 8  | 16.50 |               | 13.84 | 4.78E-06 | jmjd2B only |

Table S2  
KDM4B RNase vs noRNase

| Protein (UniProt) | Gene Symbol | Description  | Length (AA) | mw (Da)   | Indistinguishable PSMs | Peptide Sequences | % Coverage | Modifications | SPECTRAL COUNTS |             | SPECTRAL INDEX (MIC SIN) |                | RATIO |
|-------------------|-------------|--------------|-------------|-----------|------------------------|-------------------|------------|---------------|-----------------|-------------|--------------------------|----------------|-------|
|                   |             |              |             |           |                        |                   |            |               | 2BNORNASE       | 2BWITHRNASE | 2BNORNASE                | 2BWITHRNASE    |       |
| Q14744            | PRMT5       | ANM5_HUMAN   | 637         | 72817.60  | 70                     | 25                | 43.50      | Acetyl (Prote | 59.15           |             | 3.39E-05                 | 2BNORNASE Only |       |
| P46821            | MAP1B       | MAP1B_HUMAN  | 2468        | 272001.20 | 31                     | 29                | 17.70      | Acetyl (Prote | 30.90           |             | 1.64E-06                 | 2BNORNASE Only |       |
| Q9BQA1            | WDR77       | MEP50_HUMAN  | 342         | 36791.10  | 20                     | 11                | 41.50      | Carbamidom    | 17.96           |             | 1.78E-05                 | 2BNORNASE Only |       |
| E7EVX8            | PRPF31      | E7EVX8_HUMAN | 493         | 55655.50  | Q8WVW3;                | 14                | 11         | 32.00         | Gln->pyro-Gl    | 10.86       | 3.00E-06                 | 2BNORNASE Only |       |
| E7EX17            | E1F48       | E7EX17_HUMAN | 616         | 69290.40  | P23588;                | 14                | 17         | 29.10         |                 | 8.92        | 3.16E-06                 | 2BNORNASE Only |       |
| Q9Y2W1            | THRAP3      | TR150_HUMAN  | 955         | 108871.00 |                        | 12                | 9          | 8.90          | Oxidation (M    | 11.00       | 2.92E-06                 | 2BNORNASE Only |       |
| B5ME19            | E1F3CL      | E1F3CL_HUMAN | 914         | 105548.00 | H3BRV0;Q99             | 10                | 10         | 10.20         | Carbamidom      | 8.00        | 1.18E-06                 | 2BNORNASE Only |       |
| P98175            | RBM10       | RBM10_HUMAN  | 930         | 103640.00 | P98175-2;              | 10                | 9          | 13.60         | Oxidation (M    | 8.00        | 1.19E-06                 | 2BNORNASE Only |       |
| Q99714            | HSO17B10    | HC02_HUMAN   | 261         | 26039.60  | Q99714-2;              | 9                 | 4          | 32.50         |                 | 9.00        | 2.21E-06                 | 2BNORNASE Only |       |
| B4DLW8            | DDX5        | B4DLW8_HUMAN | 535         | 69284.80  | J3KTA4;P178            | 9                 | 14         | 28.40         | Carbamidom      | 6.49        | 1.90E-06                 | 2BNORNASE Only |       |
| Q9UH86            | L1MA1       | L1MA1_HUMAN  | 759         | 85387.50  | Q9UH86-4;              | 9                 | 9          | 13.70         |                 | 7.92        | 1.34E-06                 | 2BNORNASE Only |       |
| P04792            | HSPB1       | HSPB1_HUMAN  | 205         | 22822.50  |                        | 9                 | 7          | 50.20         | Gln->pyro-Gl    | 7.00        | 5.91E-06                 | 2BNORNASE Only |       |
| P09012            | SNRPA       | SNRPA_HUMAN  | 282         | 31331.20  |                        | 9                 | 7          | 33.30         | Acetyl (Prote   | 4.95        | 3.79E-06                 | 2BNORNASE Only |       |
| Q15208            | STK38       | STK38_HUMAN  | 465         | 54281.40  |                        | 8                 | 8          | 15.90         |                 | 7.00        | 2.82E-06                 | 2BNORNASE Only |       |
| B3KVR1            | SNRPN       | B3KVR1_HUMAN | 244         | 24652.10  | J3QLE5;P146            | 8                 | 5          | 26.00         | Oxidation (M    | 7.00        | 6.42E-06                 | 2BNORNASE Only |       |
| E9PH50            | LANCL1      | E9PH50_HUMAN | 196         | 45361.60  | Q43813;                | 8                 | 7          | 48.00         | Carbamidom      | 6.00        | 3.13E-06                 | 2BNORNASE Only |       |
| P08621            | SNRNP70     | RU17_HUMAN   | 437         | 50713.40  | P08621-2;              | 8                 | 8          | 16.10         |                 | 6.96        | 2.47E-06                 | 2BNORNASE Only |       |
| P13639            | EEF2        | EEF2_HUMAN   | 858         | 95529.10  |                        | 8                 | 8          | 11.00         | Ammonia-los     | 7.00        | 7.00E-07                 | 2BNORNASE Only |       |
| P62316            | SNRPD2      | SMD2_HUMAN   | 118         | 13536.20  |                        | 8                 | 5          | 46.60         | Acetyl (Prote   | 4.96        | 7.59E-06                 | 2BNORNASE Only |       |
| Q01085            | TIAL1       | TIAL1_HUMAN  | 375         | 43529.10  | Q01085-2;              | 7                 | 6          | 20.50         | Gln->pyro-Gl    | 6.86        | 2.80E-06                 | 2BNORNASE Only |       |
| Q14247            | CTTN        | SRCE_HUMAN   | 550         | 61710.60  |                        | 7                 | 7          | 12.70         | Carbamidom      | 6.94        | 1.40E-06                 | 2BNORNASE Only |       |
| Q6UB35            | MTFHFDL1    | CTTM_HUMAN   | 978         | 105012.00 |                        | 7                 | 6          | 9.40          |                 | 6.99        | 6.99E-07                 | 2BNORNASE Only |       |
| E9PK09            | BCLAF1      | E9PK09_HUMAN | 726         | 100424.00 | E9PK09;E9PK            | 7                 | 6          | 7.90          | Oxidation (M    | 2.99        | 4.12E-07                 | 2BNORNASE Only |       |
| Q60506            | SYNCRP      | HNRPO_HUMAN  | 623         | 58843.40  | Q60506-2;Q6            | 7                 | 6          | 12.90         |                 | 3.97        | 1.12E-06                 | 2BNORNASE Only |       |
| Q13885            | TUBB2A      | TUBB2A_HUMAN | 445         | 50047.00  | Q9BVA1;                | 7                 | 21         | 53.70         | Carbamidom      | 2.50        | 4.55E-07                 | 2BNORNASE Only |       |
| P52732            | KIF11       | KIF11_HUMAN  | 1056        | 119391.00 |                        | 6                 | 7          | 7.50          |                 | 6.00        | 8.71E-07                 | 2BNORNASE Only |       |
| Q08554            | DSC1        | DSC1_HUMAN   | 894         | 94010.20  | Q08554-2;              | 6                 | 5          | 8.00          | Carbamidom      | 4.00        | 1.19E-06                 | 2BNORNASE Only |       |
| E9PMI6            | CLNS1A      | E9PMI6_HUMAN | 167         | 26252.90  | J3KN38;P541            | 6                 | 4          | 34.10         |                 | 4.98        | 1.60E-06                 | 2BNORNASE Only |       |
| Q14008            | CKAP5       | CKAP5_HUMAN  | 2032        | 226708.00 | Q14008-2;Q1            | 5                 | 4          | 2.70          |                 | 4.00        | 9.21E-08                 | 2BNORNASE Only |       |
| Q9Y2H1            | STK38L      | ST38L_HUMAN  | 464         | 54094.50  |                        | 5                 | 7          | 18.10         | Carbamidom      | 2.98        | 7.55E-07                 | 2BNORNASE Only |       |
| Q53E16            | PDCD4       | PDCD4_HUMAN  | 469         | 50670.60  | Q53E16-2;              | 5                 | 4          | 12.70         |                 | 5.00        | 6.97E-07                 | 2BNORNASE Only |       |
| Q92945            | KHSRP       | FUBP2_HUMAN  | 711         | 73268.10  |                        | 5                 | 6          | 10.80         |                 | 2.98        | 4.31E-07                 | 2BNORNASE Only |       |
| E9P19             | EEF1D       | E9P19_HUMAN  | 204         | 71544.20  | E9P191;E9PK            | 5                 | 3          | 36.90         |                 | 4.00        | 2.09E-06                 | 2BNORNASE Only |       |
| J3KTL2            | SRF         | J3KTL2_HUMAN | 253         | 22500.00  | Q07955;Q07             | 5                 | 5          | 32.30         | Carbamidom      | 5.00        | 2.74E-06                 | 2BNORNASE Only |       |
| P26599            | PTBP1       | PTBP1_HUMAN  | 531         | 59758.00  | P26599-2;P2            | 5                 | 4          | 12.10         |                 | 3.96        | 5.65E-07                 | 2BNORNASE Only |       |
| P47756            | CAPZB       | CAPZB_HUMAN  | 277         | 30681.40  | P47756-2;              | 5                 | 4          | 16.50         | Acetyl (Prote   | 2.95        | 1.43E-06                 | 2BNORNASE Only |       |
| P62424            | RPL7A       | RPL7A_HUMAN  | 266         | 21585.40  | Q5TR8U;                | 5                 | 4          | 21.50         |                 | 3.00        | 1.24E-06                 | 2BNORNASE Only |       |
| B4DJP7            | SNRPD3      | B4DJP7_HUMAN | 120         | 13943.30  | P62318;                | 4                 | 2          | 15.80         | Oxidation (M    | 2.00        | 6.40E-06                 | 2BNORNASE Only |       |
| K7EQ02            | DAZAP1      | K7EQ02_HUMAN | 225         | 40611.90  | Q96P65;Q96             | 4                 | 3          | 18.70         | Acetyl (Prote   | 2.00        | 6.14E-07                 | 2BNORNASE Only |       |
| P11717            | IGF2R       | MPRI_HUMAN   | 2491        | 274937.00 |                        | 4                 | 4          | 2.00          | Carbamidom      | 3.00        | 6.53E-08                 | 2BNORNASE Only |       |
| Q13247            | SRSF6       | SRSF6_HUMAN  | 344         | 38485.70  | Q13247-3;              | 4                 | 4          | 11.00         | Gln->pyro-Gl    | 2.98        | 1.53E-06                 | 2BNORNASE Only |       |
| A6P9W9            | SELENP1     | A6P9W9_HUMAN | 514         | 48381.10  | Q13228;Q13             | 4                 | 4          | 13.50         |                 | 4.98        | 7.86E-07                 | 2BNORNASE Only |       |
| Q8WUY3            | PRUNE2      | Q8WUY3_HUMAN | 3088        | 337607.00 | Q8WUY3-2;Q             | 4                 | 3          | 1.40          | Gln->pyro-Gl    | 3.00        | 6.36E-08                 | 2BNORNASE Only |       |
| Q9UKV8            | AGO2        | AGO2_HUMAN   | 859         | 93794.30  | Q9UKV8-2;              | 4                 | 4          | 5.10          |                 | 3.00        | 2.43E-07                 | 2BNORNASE Only |       |
| P67936            | TPM4        | TPM4_HUMAN   | 248         | 28576.50  |                        | 4                 | 2          | 7.30          |                 | 0.99        | 9.74E-08                 | 2BNORNASE Only |       |
| D6RAF8            | HNRNPD      | D6RAF8_HUMAN | 221         | 32904.10  | Q14103;Q14             | 4                 | 6          | 29.90         | Carbamidom      | 0.99        | 1.50E-06                 | 2BNORNASE Only |       |
| J3KS22            | DCXR        | J3KS22_HUMAN | 224         | 25968.60  | J3QS36;Q724            | 4                 | 3          | 14.70         |                 | 3.00        | 1.28E-06                 | 2BNORNASE Only |       |
| P07553            | SF3B1       | SF3B1_HUMAN  | 1304        | 146116.00 |                        | 4                 | 3          | 3.30          |                 | 4.00        | 2.24E-07                 | 2BNORNASE Only |       |
| P00390            | GSR         | GSHR_HUMAN   | 522         | 47363.30  | P00390-2;P0            | 4                 | 4          | 12.50         | Carbamidom      | 3.99        | 1.56E-06                 | 2BNORNASE Only |       |
| P10644            | PRKAR1A     | KAPQ_HUMAN   | 381         | 43063.00  |                        | 4                 | 4          | 12.90         |                 | 2.98        | 7.53E-07                 | 2BNORNASE Only |       |
| P23246            | SFPQ        | SFPQ_HUMAN   | 707         | 76299.70  |                        | 4                 | 4          | 6.40          |                 | 3.00        | 4.95E-07                 | 2BNORNASE Only |       |
| P23528            | CFL1        | COP1_HUMAN   | 166         | 18536.10  |                        | 4                 | 5          | 39.20         | Acetyl (Prote   | 2.95        | 3.41E-06                 | 2BNORNASE Only |       |
| P26641            | EEF1G       | EEF1G_HUMAN  | 437         | 50213.20  |                        | 4                 | 3          | 8.50          | Acetyl (Prote   | 2.00        | 1.87E-07                 | 2BNORNASE Only |       |
| Q1A82             | SRSF7       | Q1A82_HUMAN  | 235         | 26050.30  | Q16629;Q16             | 3                 | 3          | 31.80         |                 | 3.00        | 1.47E-06                 | 2BNORNASE Only |       |
| J3L380            | C1QB        | J3L380_HUMAN | 178         | 31414.70  | J3LQ07;Q070            | 3                 | 3          | 33.90         | Carbamidom      | 3.00        | 5.08E-07                 | 2BNORNASE Only |       |
| P62805            | HIST1H4H    | H4_HUMAN     | 103         | 11378.40  |                        | 3                 | 3          | 29.10         |                 | 3.00        | 6.37E-06                 | 2BNORNASE Only |       |
| Q35Y84            | SERPINB12   | Q35Y84_HUMAN | 425         | 46355.10  | Q96P63;                | 3                 | 4          | 9.40          | Oxidation (M    | 2.00        | 8.69E-07                 | 2BNORNASE Only |       |
| Q9UBV8            | PEF1        | PEF1_HUMAN   | 284         | 30433.30  |                        | 3                 | 2          | 8.50          | Oxidation (M    | 2.00        | 1.61E-07                 | 2BNORNASE Only |       |
| C9YQ9             | RPL22L1     | C9YQ9_HUMAN  | 121         | 14643.30  | H0Y8C2;Q6P             | 3                 | 2          | 15.70         |                 | 1.00        | 3.60E-06                 | 2BNORNASE Only |       |
| Q01469            | FABP5       | FABP5_HUMAN  | 135         | 15190.60  |                        | 3                 | 2          | 13.30         | Acetyl (Prote   | 1.00        | 1.14E-06                 | 2BNORNASE Only |       |
| Q15437            | SEC23B      | SEC23B_HUMAN | 767         | 86699.60  |                        | 3                 | 4          | 7.30          | Acetyl (Prote   | 1.00        | 1.07E-07                 | 2BNORNASE Only |       |
| Q07540            | DIAT        | H0YD04_HUMAN | 479         | 60313.20  | P10515;                | 3                 | 3          | 9.60          | Carbamidom      | 3.00        | 2.21E-07                 | 2BNORNASE Only |       |
| P21333            | FLNA        | FLNA_HUMAN   | 2647        | 277152.00 | P21333-2;Q5            | 3                 | 3          | 1.80          |                 | 3.00        | 3.94E-06                 | 2BNORNASE Only |       |
| P22694            | PRKACB      | KAPCB_HUMAN  | 351         | 41459.30  | P22694-2;P2            | 3                 | 3          | 8.90          |                 | 2.97        | 5.88E-07                 | 2BNORNASE Only |       |
| P38919            | IF4A3       | IF4A3_HUMAN  | 411         | 46949.20  |                        | 3                 | 3          | 8.50          |                 | 2.92        | 8.35E-07                 | 2BNORNASE Only |       |
| P39656            | DDOST       | O5T48_HUMAN  | 456         | 50895.00  |                        | 3                 | 3          | 7.20          |                 | 2.99        | 4.13E-07                 | 2BNORNASE Only |       |
| P60866            | RPS20       | RS20_HUMAN   | 119         | 16031.50  | P60866-2;              | 3                 | 3          | 22.70         |                 | 2.97        | 7.92E-06                 | 2BNORNASE Only |       |
| P61158            | ACTR3       | ARP3_HUMAN   | 418         | 47449.10  |                        | 3                 | 3          | 12.90         | Carbamidom      | 0.99        | 7.0E-08                  | 2BNORNASE Only |       |
| P62304            | SNRPE       | RUXE_HUMAN   | 92          | 10814.70  |                        | 3                 | 2          | 25.00         | Oxidation (M    | 2.00        | 2.01E-06                 | 2BNORNASE Only |       |
| Q76031            | CLPX        | CLPX_HUMAN   | 653         | 69360.80  |                        | 2                 | 2          | 4.10          |                 | 2.00        | 3.00E-07                 | 2BNORNASE Only |       |
| Q94919            | ENDOD1      | ENDOD1_HUMAN | 500         | 55325.40  |                        | 2                 | 2          | 8.40          |                 | 1.00        | 2.57E-07                 | 2BNORNASE Only |       |
| Q00577            | PURA        | PURA_HUMAN   | 322         | 34979.40  |                        | 2                 | 2          | 15.20         |                 | 2.00        | 5.44E-07                 | 2BNORNASE Only |       |
| Q14011            | CIRBP       | CIRBP_HUMAN  | 172         | 18672.80  |                        | 2                 | 2          | 18.60         |                 | 2.00        | 2.00E-07                 | 2BNORNASE Only |       |
| B4DT31            | FUBP1       | B4DT31_HUMAN | 665         | 68742.10  | E9PE85;Q964            | 2                 | 3          | 4.80          |                 | 1.98        | 2.52E-07                 | 2BNORNASE Only |       |
| B4DMU0            | FUBP1       | B4DMU0_HUMAN | 346         | 33409.60  | J3QKT4;P323            | 2                 | 2          | 9.90          | Carbamidom      | 1.98        | 8.32E-07                 | 2BNORNASE Only |       |
| Q9Y657            | SPIN1       | SPIN1_HUMAN  | 262         | 29653.80  |                        | 2                 | 2          | 10.30         |                 | 2.00        | 7.58E-07                 | 2BNORNASE Only |       |
| Q52L0             | FAM98B      | FA98B_HUMAN  | 330         | 45644.80  | Q52L0D-2;              | 2                 | 2          | 7.00          | Carbamidom      | 2.00        | 1.55E-07                 | 2BNORNASE Only |       |
| Q9NR12            | BAZ1A       | BAZ1A_HUMAN  | 1556        | 175277.00 | Q9NR12-2;              | 2                 | 2          | 1.50          |                 | 2.00        | 1.95E-07                 | 2BNORNASE Only |       |
| B7Z403            | GLOD4       | B7Z403_HUMAN | 289         | 33283.60  | Q9HC38;Q9H             | 2                 | 2          | 8.00          |                 | 1.98        | 5.69E-07                 | 2BNORNASE Only |       |
| P84090            | ERH         | ERH_HUMAN    | 104         | 12269.00  |                        | 2                 | 2          | 21.20         | Acetyl (Prote   | 1.00        | 9.10E-07                 | 2BNORNASE Only |       |
| F5CWF6            | CCT2        | F5CWF6_HUMAN | 530         | 57596.20  | P8VQ14;P78             | 2                 | 2          | 8.40          |                 | 1.00        | 1.69E-07                 | 2BNORNASE Only |       |
| Q5T196            | FLAD1       | Q5T196_HUMAN | 456         | 36931.40  | Q8NFF5;Q8N             | 2                 | 2          | 10.50         |                 | 1.99        | 1.24E-07                 | 2BNORNASE Only |       |
| P06702            | S100A9      | S100A9_HUMAN | 114         | 13251.50  |                        | 2                 | 2          | 17.50         |                 | 1.00        | 2.61E-06                 | 2BNORNASE Only |       |
| B4DGU4            | CTNNB1      | B4DGU4_HUMAN | 774         | 85676.40  | P35222;                | 2                 | 2          | 2.80          | Carbamidom      | 1.50        | 9.45E-08                 | 2BNORNASE Only |       |
| B4DEM7            | CCT8        | B4DEM7_HUMAN | 529         | 59744.60  | B4DQH4;P50             | 2                 | 2          | 5.30          |                 | 0.99        | 4.04E-08                 | 2BNORNASE Only |       |
| C9IZL7            | NONO        | C9IZL7_HUMAN | 207         | 43946.20  | C9IYS8;Q152            | 2                 | 2          | 8.20          |                 | 1.98        | 7.45E-07                 | 2BNORNASE Only |       |
| Q13572            | ITPK1       | ITPK1_HUMAN  | 414         | 45700.20  |                        | 2                 | 2          | 8.20          |                 | 1.00        | 1.27E-07                 | 2BNORNASE Only |       |
| C9JW96            | PHB         | C9JW96_HUMAN | 246         | 29857.90  | C9JZ20;E7ES            | 2                 | 2          | 10.40         |                 | 1.00        | 3.25E-07                 | 2BNORNASE Only |       |
| E9PLA9            | CAPRIN1     | E9PLA9_HUMAN | 186         | 77012.40  | G3V153;Q14             | 2                 | 2          | 1.60          |                 | 1.00        | 1.38E-07                 | 2BNORNASE Only |       |
| Q9P219            | CDC80C      | DAFL_E_HUMAN | 2028        | 228685.00 |                        | 2                 | 3          | 12.40         |                 | 1.00        | 3.41E-08                 | 2BNORNASE Only |       |
| P62306            | SNRPF       | SNRPF_HUMAN  | 86          | 9736.79   |                        | 2                 | 2          | 24.40         | Carbamidom      | 2.00        | 8.01E-07                 | 2BNORNASE Only |       |
| D6R9W4            | DBN1        | D6R9W4_HUMAN | 317         | 36450.80  | Q16643;Q16             | 2                 | 2          | 9.80          |                 | 2.00        | 4.73E-07                 | 2BNORNASE Only |       |
| J3KXN5            | DDX41       | J3KXN5_HUMAN | 640         | 69973.10  | Q9UJV9;                | 2                 | 3          | 7.10          |                 | 2.00        | 2.70E-07                 | 2BNORNASE Only |       |
| MOR248            | ECH1        | MOR248_HUMAN | 267         | 35883.40  | Q13011;                | 2                 | 2          | 9.40          |                 | 2.00        | 4.15E-07                 | 2BNORNASE Only |       |
| Q75131            | CPNE3       | CPNE3_HUMAN  | 537         | 60236.20  |                        | 2                 | 2          | 3.40          |                 | 2.00        | 2.14E-07                 | 2BNORNASE Only |       |
| Q13509            | TUBB3       | TBB3_HUMAN   | 450         | 50526.30  |                        | 2                 | 14         | 33.60         | Carbamidom      | 2.00        | 2.03E-07                 | 2BNORNASE Only |       |
| P21796            | VDAC1       | VDAC1_HUMAN  | 283         | 30825.60  |                        | 2                 | 2          | 3.90          |                 | 1.98        | 5.54E-07                 | 2BNORNASE Only |       |
| P31025            |             |              |             |           |                        |                   |            |               |                 |             |                          |                |       |

|        |             |            |      |           |             |     |    |       |               |       |          |          |
|--------|-------------|------------|------|-----------|-------------|-----|----|-------|---------------|-------|----------|----------|
| P46781 | RPS9        | RS9_HUMAN  | 194  | 22631.60  |             | 21  | 10 | 47.90 | 7.99          | 10.98 | 1.22E-05 | 5.85E-06 |
| B4E2W0 | HADHB       | B4E2W0_HU  | 452  | 51387.60  | P55084;     | 9   | 6  | 12.20 | 4.94          | 2.96  | 1.85E-06 | 8.86E-07 |
| P14923 | JUP         | FLAK_HUMAN | 745  | 81908.90  |             | 46  | 21 | 37.40 | 16.46         | 23.86 | 3.72E-06 | 1.17E-06 |
| F5G6Z8 | KDM4B       | F5G6Z8_HU  | 1130 | 122143.00 | Q94953;     | 75  | 30 | 30.30 | 38.94         | 29.95 | 5.83E-06 | 2.66E-06 |
| P05141 | SLC25A5     | ADL2_HUMAN | 298  | 32903.20  |             | 13  | 11 | 34.90 | Acetyl (Prote | 6.00  | 7.00     | 6.26E-06 |
| P61247 | RPS3A       | RS3A_HUMAN | 364  | 28997.80  |             | 30  | 14 | 48.10 | Carbamidom    | 11.59 | 11.66    | 6.53E-06 |
| P25705 | ATPSA1      | ATPA_HUMAN | 553  | 59875.70  |             | 28  | 15 | 31.60 | Oxidation (M  | 10.80 | 12.71    | 4.09E-06 |
| P08107 | HSPA1B; HSP | HSP71_HUM  | 641  | 70189.10  |             | 41  | 26 | 50.40 | Carbamidom    | 16.81 | 17.86    | 4.15E-06 |
| Q92804 | TAF15       | RBP56_HUM  | 592  | 61683.10  | Q92804-2;   | 18  | 9  | 28.40 | Gln->pyro-Gl  | 8.91  | 5.94     | 6.46E-06 |
| Q98261 | MRPL37      | RM37_HUM   | 423  | 55061.90  | SAR369;     | 3   | 2  | 7.30  |               | 1.00  | 1.00     | 9.46E-08 |
| P81605 | DCD         | DCD_HUMAN  | 110  | 12442.50  | P81605-2;   | 14  | 5  | 40.90 |               | 5.00  | 7.00     | 1.07E-05 |
| B4DT58 | DPF2        | B4DT58_HU  | 207  | 44235.20  | J3KMZ8;Q92  | 5   | 3  | 15.90 | Acetyl (Prote | 1.00  | 1.00     | 1.87E-07 |
| Q95831 | AIFM1       | AIFM1_HUM  | 613  | 66433.70  | Q95831-3;   | 3   | 3  | 5.70  |               | 0.99  | 0.99     | 5.43E-08 |
| Q13263 | TRIM28      | TRIFB_HUM  | 835  | 79639.60  | Q13263-2;   | 5   | 4  | 9.40  | Acetyl (Prote | 1.98  | 1.98     | 2.22E-07 |
| J3KR55 | RPL17       | J3KR55_HU  | 174  | 26409.20  | J3QQT2;J3QS | 3   | 3  | 25.40 |               | 1.98  | 0.99     | 2.42E-06 |
| P55884 | EIF3B       | EIF3B_HUM  | 814  | 99219.20  | P55884-2;   | 34  | 19 | 27.50 | Acetyl (Prote | 12.99 | 16.00    | 2.13E-06 |
| 80QYK0 | EWSR1       | 80QYK0_HU  | 618  | 62631.10  | Q01844;Q01  | 38  | 8  | 16.20 | Carbamidom    | 12.87 | 13.86    | 5.97E-06 |
| Q92922 | SMARCC1     | SMRCL_HUM  | 1105 | 123114.00 |             | 7   | 5  | 6.60  | Acetyl (Prote | 2.00  | 1.00     | 6.89E-08 |
| G5E975 | SMARCB1     | G5E975_HU  | 394  | 43238.60  | Q12824;Q12  | 11  | 7  | 18.90 |               | 2.97  | 4.95     | 1.10E-06 |
| P32119 | PRDX2       | PRDX2_HUM  | 198  | 2192.30   |             | 14  | 6  | 31.80 | Gln->pyro-Gl  | 5.49  | 3.49     | 4.00E-06 |
| Q8N1N4 | KRT78       | K2C78_HUM  | 520  | 56974.60  |             | 15  | 14 | 23.70 | Carbamidom    | 7.98  | 5.97     | 1.67E-06 |
| Q96019 | ACTL6A      | ACTL6A_HU  | 429  | 43316.40  | Q96019-2;   | 6   | 4  | 16.50 | Gln->pyro-Gl  | 2.00  | 1.00     | 9.71E-07 |
| Q14949 | ARID1A      | ARID1A_HUM | 2285 | 206349.00 | Q14949-2;Q1 | 7   | 7  | 4.00  | Gln->pyro-Gl  | 2.98  | 1.99     | 6.88E-08 |
| Q43390 | HNRNPR      | HNRNPR_HUM | 633  | 60059.90  | Q43390-2;S4 | 2   | 4  | 7.70  |               | 0.99  | 0.99     | 1.44E-07 |
| HOYFN5 | RPS2        | HOYFN5_HU  | 195  | 31376.60  | P15880;     | 15  | 7  | 32.90 | Carbamidom    | 8.87  | 4.93     | 7.98E-06 |
| POK259 | KRT6B       | K2C6B_HUM  | 564  | 60192.40  |             | 8   | 43 | 61.00 | Carbamidom    | 4.00  | 4.00     | 2.60E-06 |
| P08779 | KRT16       | K1C16_HUM  | 473  | 51362.30  |             | 66  | 35 | 69.10 | Carbamidom    | 30.00 | 27.00    | 1.90E-05 |
| Q16822 | PKC2        | PKCGM_HUM  | 640  | 70864.80  |             | 18  | 10 | 18.60 | Oxidation (M  | 8.87  | 7.88     | 1.76E-06 |
| Q04695 | KRT17       | K1C17_HUM  | 432  | 48202.10  |             | 21  | 27 | 50.90 | Ammonia-iot   | 8.95  | 8.94     | 4.12E-06 |
| P62266 | RPS23       | RS23_HUMA  | 143  | 15833.70  |             | 5   | 2  | 15.40 |               | 2.00  | 2.00     | 2.83E-06 |
| P49411 | TUFM        | EFTU_HUMAN | 452  | 49636.20  |             | 33  | 12 | 34.70 | Carbamidom    | 17.00 | 14.00    | 8.08E-06 |
| Q92734 | TFG         | TFG_HUMAN  | 400  | 43102.00  | Q92734-2;   | 92  | 16 | 49.00 | Acetyl (Prote | 29.80 | 31.82    | 3.25E-05 |
| P62906 | RPL10A      | RL10A_HUM  | 217  | 24869.60  |             | 5   | 4  | 14.70 |               | 2.00  | 1.00     | 2.52E-06 |
| P04908 | HIST1H2AE;  | H2A1B_HUM  | 130  | 14047.00  | POCOSS;P206 | 13  | 3  | 27.10 |               | 4.98  | 5.98     | 6.45E-06 |
| M0R210 | RPS16       | M0R210_HU  | 129  | 16471.10  | P62249;     | 18  | 9  | 62.80 | Carbamidom    | 8.91  | 5.94     | 3.38E-05 |
| P05576 | ATP5B       | ATP5B_HUM  | 529  | 56668.70  |             | 8   | 6  | 16.10 |               | 3.95  | 2.98     | 7.03E-07 |
| P10809 | HSPD1       | CH60_HUMAN | 573  | 61178.50  |             | 41  | 18 | 46.60 | Carbamidom    | 22.96 | 15.00    | 6.41E-06 |
| K7EL20 | EIF3G       | K7EL20_HUM | 263  | 35679.00  | K7ER90;Q753 | 17  | 7  | 31.70 |               | 7.97  | 6.00     | 2.62E-06 |
| HOY6E7 | RBMX        | HOY6E7_HU  | 292  | 42224.20  | H3B827;H3B  | 2   | 2  | 34.60 |               | 0.99  | 0.99     | 3.66E-07 |
| Q13347 | EIF3I       | EIF3I_HUMA | 325  | 36568.70  |             | 18  | 11 | 47.70 | Carbamidom    | 11.00 | 5.00     | 6.88E-06 |
| HOY449 | YBX1        | HOY449_HU  | 374  | 35992.70  | P67809;     | 3   | 3  | 18.20 |               | 2.00  | 1.00     | 6.73E-07 |
| B4DV88 | ELAVL1      | B4DV88_HU  | 353  | 39061.70  |             | 5   | 4  | 11.90 | Carbamidom    | 3.98  | 1.00     | 1.70E-06 |
| Q15393 | SF3B3       | SF3B3_HUM  | 1217 | 135852.00 |             | 15  | 12 | 12.70 |               | 7.00  | 4.99     | 6.89E-07 |
| Q00796 | SORD        | DHS0_HUM   | 357  | 38389.90  |             | 11  | 7  | 23.50 | Acetyl (Prote | 4.99  | 3.99     | 2.64E-06 |
| Q41343 | DHX15       | DHX15_HUM  | 795  | 91799.20  |             | 14  | 9  | 11.70 | Carbamidom    | 6.00  | 7.00     | 1.37E-06 |
| P07437 | TUBB        | TBB5_HUMAN | 444  | 48765.00  |             | 21  | 24 | 62.40 | Carbamidom    | 10.89 | 6.93     | 3.25E-06 |
| B4DSU6 | HNRNPC      | B4DSU6_HU  | 147  | 27876.50  | B4DV08;G3V  | 9   | 3  | 30.60 | Oxidation (M  | 4.98  | 3.97     | 4.01E-06 |
| P68363 | TUBA1B      | TBA1B_HUM  | 451  | 50245.70  |             | 14  | 14 | 40.40 | Carbamidom    | 7.80  | 4.84     | 5.86E-06 |
| Q9Y310 | RTCB        | RTCB_HUMA  | 505  | 55318.90  |             | 15  | 8  | 20.80 | Gln->pyro-Gl  | 7.00  | 3.00     | 1.28E-06 |
| B4DGM3 | SMARCC1     | B4DGM3_HU  | 393  | 34441.00  | J3QK57;K7EN | 3   | 2  | 15.80 |               | 2.00  | 1.00     | 2.64E-07 |
| Q08211 | DHX9        | DHX9_HUMA  | 1270 | 141247.00 |             | 23  | 18 | 15.80 | Carbamidom    | 13.00 | 8.00     | 1.41E-06 |
| J3QR48 | KPNB1       | J3QR48_HU  | 149  | 97360.20  | Q14974;     | 4   | 2  | 18.10 |               | 3.00  | 1.00     | 6.63E-07 |
| F5H365 | SEC23A      | F5H365_HUM | 736  | 86321.40  | Q15436;     | 10  | 5  | 8.70  | Acetyl (Prote | 3.96  | 1.98     | 2.39E-07 |
| P23396 | RPS3        | RS3_HUMAN  | 243  | 26743.50  |             | 37  | 15 | 67.90 | Carbamidom    | 15.62 | 14.63    | 1.64E-05 |
| HOY2W2 | ATAD3A      | HOY2W2_HU  | 572  | 58056.10  | Q9NVI7;Q9N  | 7   | 7  | 13.80 |               | 1.98  | 1.00     | 3.41E-07 |
| M0R0F0 | RPS5        | M0R0F0_HU  | 200  | 29121.00  | P46782;     | 12  | 5  | 34.50 | Acetyl (Prote | 5.95  | 1.98     | 1.14E-06 |
| B4DKM5 | VDAC2       | B4DKM5_HU  | 255  | 30465.10  | P45880;P458 | 2   | 2  | 7.10  |               | 1.00  | 1.00     | 6.12E-07 |
| H7BYS8 | PCMT1       | H7BYS8_HUM | 286  | 24717.10  | J3KP72;P220 | 28  | 11 | 57.70 | Carbamidom    | 13.86 | 9.90     | 9.86E-06 |
| P62081 | RPS7        | RS7_HUMAN  | 194  | 22167.30  |             | 8   | 4  | 29.40 |               | 5.00  | 2.00     | 2.26E-06 |
| H3BLZ8 | DDX17       | H3BLZ8_HU  | 731  | 72691.20  | Q92841;Q92  | 12  | 13 | 23.70 | Carbamidom    | 7.43  | 3.96     | 1.28E-06 |
| E9PH29 | PRDX3       | E9PH29_HU  | 238  | 27477.20  | P30048;     | 8   | 4  | 18.50 |               | 4.00  | 3.00     | 2.50E-06 |
| Q92499 | DDX1        | DDX1_HUMA  | 740  | 82595.90  |             | 15  | 9  | 15.70 | Carbamidom    | 9.00  | 4.00     | 1.30E-06 |
| P54886 | ALDH18A1    | P5CS_HUMAN | 795  | 87268.60  | P54886-2;   | 7   | 6  | 8.10  |               | 2.00  | 1.00     | 1.02E-06 |
| P23526 | AHCY        | SAHH_HUM   | 432  | 44737.70  | P23526-2;   | 3   | 2  | 5.20  |               | 5.00  | 1.00     | 6.04E-07 |
| G8L8B6 | HNRNPH1     | G8L8B6_HUM | 472  | 43324.50  | P31943;     | 15  | 14 | 41.20 | Acetyl (Prote | 6.73  | 3.88     | 2.32E-06 |
| P51398 | DAP3        | DAP3_HUMAN | 398  | 43754.80  | P51398-2;P5 | 4   | 3  | 10.90 |               | 1.00  | 1.00     | 3.35E-07 |
| Q43175 | PHGDH       | SERA_HUMAN | 533  | 56758.50  |             | 6   | 4  | 9.60  |               | 4.00  | 2.00     | 9.25E-07 |
| C9J9K3 | RPSA        | C9J9K3_HU  | 264  | 32905.50  | P08865;     | 19  | 8  | 44.30 | Acetyl (Prote | 8.99  | 3.00     | 7.02E-06 |
| B4DVY1 | EIF3D       | B4DVY1_HU  | 499  | 64094.50  | Q15371;     | 6   | 5  | 10.60 | Oxidation (M  | 3.96  | 1.98     | 1.33E-06 |
| Q12905 | ILF2        | ILF2_HUMAN | 390  | 43143.20  |             | 22  | 10 | 35.90 | Gln->pyro-Gl  | 9.00  | 8.00     | 4.85E-06 |
| Q9Y265 | RUVB1       | RUVB1_HUM  | 456  | 50322.40  |             | 8   | 5  | 15.60 |               | 3.95  | 1.00     | 5.80E-07 |
| P60709 | ACTB        | ACTB_HUMAN | 375  | 41817.80  |             | 116 | 24 | 64.80 | Acetyl (Prote | 67.21 | 29.17    | 8.73E-05 |
| P12532 | CKMT1B; CK  | KCRU_HUM   | 417  | 47115.30  |             | 13  | 7  | 18.50 | Carbamidom    | 4.94  | 4.91     | 2.11E-06 |
| Q8IXB1 | DNAJC10     | DJC10_HUM  | 793  | 91255.40  |             | 10  | 8  | 11.50 | Carbamidom    | 7.96  | 1.99     | 7.65E-07 |
| K7EJ81 | EFTUD2      | K7EJ81_HUM | 962  | 105587.00 | Q15029;Q15  | 4   | 4  | 5.30  |               | 2.00  | 1.00     | 1.57E-07 |
| Q9Y222 | C14orf166   | CN166_HUM  | 244  | 28122.80  |             | 5   | 4  | 27.00 |               | 4.00  | 1.00     | 1.04E-07 |
| E7ERC4 | SSB         | E7ERC4_HU  | 184  | 46916.20  | EP9G9;P054  | 3   | 2  | 23.30 |               | 2.00  | 1.00     | 8.91E-07 |
| Q12906 | ILF3        | ILF3_HUMAN | 894  | 96000.50  | Q12906-2;Q1 | 10  | 8  | 15.20 |               | 6.00  | 2.00     | 8.76E-07 |
| P62258 | YWHAE       | I433E_HUM  | 255  | 29227.50  |             | 4   | 3  | 10.20 |               | 0.98  | 0.99     | 8.60E-07 |
| P08238 | HSP90A1     | H90B_HUM   | 724  | 83428.20  |             | 14  | 16 | 22.50 | Oxidation (M  | 6.99  | 2.99     | 1.49E-06 |
| P46783 | RPS10       | RS10_HUMA  | 165  | 18921.90  |             | 6   | 5  | 33.90 |               | 4.00  | 2.00     | 1.45E-06 |
| P24752 | ACAT1       | THIL_HUMAN | 427  | 45296.70  |             | 13  | 10 | 31.90 | Carbamidom    | 6.99  | 4.00     | 4.35E-06 |
| P68371 | TUBB4B      | TBB4B_HUM  | 445  | 49925.10  |             | 12  | 24 | 58.00 | Carbamidom    | 3.54  | 2.04     | 2.06E-06 |
| P04843 | RPN1        | RPN1_HUM   | 607  | 68706.90  |             | 4   | 3  | 6.30  |               | 3.00  | 1.00     | 2.64E-07 |
| M0KJ65 | HNRNPL      | M0KJ65_HU  | 530  | 50654.60  | P14866;P148 | 9   | 6  | 14.90 | Carbamidom    | 5.98  | 2.00     | 1.26E-06 |
| Q92506 | HSID17B8    | DH8B_HUM   | 261  | 27028.80  |             | 3   | 3  | 15.30 |               | 2.00  | 1.00     | 9.88E-07 |
| P51532 | SMARCA4     | SMCA4_HUM  | 1647 | 188517.00 | P51532-2;P5 | 5   | 7  | 4.80  |               | 2.99  | 0.99     | 1.54E-07 |
| IL3LP7 | RPS15A      | IL3LP7_HUM | 100  | 14866.00  | P62244;     | 4   | 3  | 26.00 | Oxidation (M  | 2.97  | 0.99     | 7.75E-06 |
| A8MUB1 | TUBA4A      | A8MUB1_HU  | 433  | 50018.40  | P68366;     | 10  | 13 | 37.40 | Carbamidom    | 5.97  | 1.99     | 1.59E-06 |
| D6RAN4 | RPL9        | D6RAN4_HU  | 182  | 21903.80  | P32969;     | 4   | 3  | 23.60 |               | 2.97  | 0.99     | 2.47E-06 |
| Q05639 | EEF1A2      | EF1A2_HUM  | 463  | 50964.40  |             | 16  | 11 | 25.50 | Gln->pyro-Gl  | 4.50  | 1.50     | 5.70E-06 |
| P55795 | HNRNPH2     | HNRH2_HUM  | 449  | 49358.40  |             | 12  | 10 | 31.60 | Carbamidom    | 9.00  | 2.00     | 1.97E-06 |
| P07237 | P4HB        | PDI1_HUM   | 508  | 57224.80  |             | 17  | 12 | 26.00 | Oxidation (M  | 11.81 | 2.97     | 3.02E-06 |
| J3QLR8 | MRPS23      | J3QLR8_HU  | 152  | 21811.30  | Q9Y309;     | 3   | 3  | 19.70 |               | 1.00  | 1.00     | 1.59E-06 |
| Q15365 | PCBP1       | PCBP1_HUM  | 356  | 37564.00  |             | 16  | 11 | 44.10 | Acetyl (Prote | 10.92 | 1.97     | 4.08E-06 |
| A8MX99 | MATR3       | A8MX99_HU  | 805  | 94816.90  | P43243;     | 6   | 3  | 5.90  |               | 3.96  | 0.99     | 2.00E-07 |
| Q13151 | HNRNPA0     | ROA0_HUM   | 305  | 30911.80  |             | 8   | 6  | 25.90 |               | 6.00  | 2.00     | 3.28E-06 |
| P52597 | HNRNPF      | HNRPF_HUM  | 415  | 45750.90  |             | 12  | 8  | 23.10 | Acetyl (Prote | 9.00  | 2.00     | 2.54E-06 |
| P42704 | LRPPRC      | LRPPRC_HUM | 1394 | 158219.00 |             | 3   | 3  | 2.80  | Carbamidom    | 2.00  | 1.00     | 9.29E-08 |

Table S3

**RIP and Chip q-PCR primer**

|       |                            |
|-------|----------------------------|
| C3 F  | AACAGAAGTACCTGTGCGCC       |
| C3 R  | CCAGAGTCATCCCTGCTTC        |
| I3a F | AGGGATGACTCTGGGAGGTAA      |
| I3a R | CTATGAAAGGGTCAGCCTGTG      |
| I3b F | CACAGGCTGACCCTTTCATA       |
| I3b R | ACCTTCTGTTGGCTCCTGAT       |
| I3c F | GCACCATGCTAGGCATTAGA       |
| I3c R | AAAGGCAAGGCCATTTACAC       |
| I3d F | TCCCTTCTCTCCTCTGATGC       |
| I3d R | GGGAGCAGGGAACAGACAAT       |
| CE1 F | AACTAGGAATGTGGCCTTGG       |
| CE1 R | CAATTCAGTTCTATGATGGGA      |
| I3e F | CCTCCATTTGGGTTGTTACC       |
| I3e R | CAAGCCAATTGCCTTGGTCTAAACCA |
| CE2 F | GGTGATGCAAGTGGGAAGTC       |
| CE2 R | GCTGAGTCACAAGTTGCACA       |
| CE5 F | CGTTGTTAAGAAGTAGAACTAA     |
| CE5 R | AACAGATGAGCTGAAGGCTCT      |
| I3f F | GCAGAAAACCTGGACTGGCA       |
| I3f R | CCATGCCTCATTTTCCACCC       |
| I3g F | TGAAACTGAAAGAGACTGATGACT   |
| I3g R | GCCTAACAGCTCACTAATCAAAG    |
| CE3 F | ACCTCCCCAACTTTACATGCT      |
| CE3 R | CAGGGTCTGGTCATTTTGGAGA     |
| I3h F | GGGCTACTCTTTGATTGCTG       |
| I3h R | GTCCTCACAACATCCCTGTG       |
| I3i F | CTTCTCCCAAGCCAGACTCA       |
| I3i R | CATGTGTGTTTCCCTGGCTT       |
| I3j F | AGGCTAAGTCTTGCCCAAAG       |
| I3j R | GGAGTCAGGATGCCTCATTT       |
| I3k F | TAGGCAGAGAAGCCAGAACA       |
| I3k R | CCCTGTGACCACAGTGGCCC       |
| I3l F | TGAACACTCCTTGGTGCTTT       |
| I3l R | ATGAGGATTTACCAGGCA         |
| C4 F  | CACTGAGGAGACAACCCAGA       |
| C4 R  | CACTACACCTGGCTCAATGG       |
| I4a F | GGAAAGAACATGAGGTTGGG       |
| I4a R | GAAATTGAGACCCAGAAGGG       |

**siRNA oligo**

|              |                               |
|--------------|-------------------------------|
| KDM4B_siRNA1 | CUCUUCACGCAGUACAAUA [dT][dT]  |
| KDM4B_siRNA2 | CAAAUACGUGCCUACAUA[dT][dT]    |
| AR-V7_siRNA1 | GUAGUUGUGAGUAUCAUGA [dT] [dT] |

AR-V7\_siRNA2 GAGGCUUAGGAGCUUAGGU [dT][dT]

**RNA oligo**

AR-A1 CAAUGAAACUGAAAGAGACUGAUGACUCUCCUGAGGGUGG (Btn)  
AR-A2 CUCAUCUCCAGUCUGAGUAAUAAUGCUUAUAGUAUUAUGG (Btn)  
AR-A2 CUCAUCUCCAGUCUGAGUAAUAAUGCUUAUAGUAUUAUGG  
AR-A2 mut CUCAUCUCCAGUCUGAGGCCUAAUGCUUAUAGAAUUAUGC  
AR-A2-1 CUCAUCUCCAGUCUGAGUAA  
AR-A2-2 UAAUGCUUAUAGUAUUAUGC  
AR-A2-3 GUCUGAGUAAUAAUGCUUAU

**RIP and Chip q-PCR primer**

C3 F AACAGAAGTACCTGTGCGCC  
C3 R CCAGAGTCATCCCTGCTTC  
I3a F AGGGATGACTCTGGGAGGTAA  
I3a R CTATGAAAGGGTCAGCCTGTG  
I3b F CACAGGCTGACCCTTTCATA  
  
I3b R ACCTTCTGTTGGCTCCTGAT  
I3c F GCACCATGCTAGGCATTAGA  
I3c R AAAGGCAAGGCCATTTACAC  
I3d F TCCCTTCTCCTCTGATGC  
I3d R GGGAGCAGGGAACAGACAAT  
CE1 F AACTAGGAATGTGGCCTTGG  
CE1 R CAATTCCAGTTCTATGATGGGA  
I3e F CCTCCATTTGGGTTGTTACC  
I3e R CAAGCCAATTGCCTTGGTCTAAACCA  
CE2 F GGTGATGCAAGTGGGAAGTC  
CE2 R GCTGAGTCACAAGTTGCACA  
CE5 F CGTTGTTAAGAAGTAGAACTAA
